# Supplementary material for: β-Cyclodextrin/IBX in water: highly facile biomimetic one pot deprotection of THP/MOM/Ac/Ts ethers and concomitant oxidative cleavage of chalcone epoxides and oxidative dehydrogenation of alcohols
Source: Royal Society of Chemistry journal article supplement (doi:10.1039/c5gc01785h), 2015-09-01

**$\beta$ -Cyclodextrin/IBX in water: Highly facile biomimetic one pot deprotection of THP/MOM/Ac/Ts ethers and concomitant oxidative cleavage of chalcone epoxides and oxidative dehydrogenation of alcohols**

Sumit Kumar\* and Naseem Ahmed\*

*Department of Chemistry, Indian Institute of Technology Roorkee, Roorkee 247 667, India*

*\*Corresponding author. Fax and Tel.: +91 1332 285745.*

E-mail address: [sumitdcy@iitr.ac.in](mailto:sumitdcy@iitr.ac.in); [nasemfcy@iitr.ac.in](mailto:nasemfcy@iitr.ac.in)

**Table of contents**

- 1. General methods**
- 2. General procedure for the deprotection of THP, MOM, acetyl and tosyl ethers and concomitant oxidative cleavage of chalcone epoxides and oxidative dehydrogenation of alcohols**
- 3. Characterization data for selected synthesized compounds**
- 4.  $^1\text{H}$  and  $^{13}\text{C}$  NMR Spectra**

## 1. General methods

Unless otherwise noted, chemicals were purchased from commercial suppliers at the highest purity grade available and were used without further purification. Solvents were distilled by standard methods. Thin layer chromatography was performed on Merck precoated 0.25 mm silica gel plates (60F-254) using UV light as visualizing agent and/or iodine as developing agent. Silica gel (100-200 mesh) was used for column chromatography. IR spectra were recorded on FT-IR spectrometer and expressed as wave numbers ( $\text{cm}^{-1}$ ).  $^1\text{H}$  and  $^{13}\text{C}$  NMR spectra were recorded on a Brüker (500 MHz & 125 MHz) & Jeol (400 MHz & 100 MHz) spectrometer. Spectra were referenced internally to the residual proton resonance in  $\text{CDCl}_3$  ( $\delta$  7.26 ppm) or with tetramethylsilane (TMS,  $\delta$  0.00 ppm) as the internal standard. Chemical shifts ( $\delta$ ) were reported as part per million (ppm) in  $\delta$  scale downfield from TMS.  $^{13}\text{C}$  NMR spectra were referenced to  $\text{CDCl}_3$  ( $\delta$  77.23 ppm, the middle peak). Coupling constants are expressed in Hz. The following abbreviations are used to explain the multiplicities: s = singlet, d = doublet, t = triplet, dd = doublet of doublets, m = multiplet, br = broad. High-resolution mass spectra (HRMS) were obtained on a Brüker micrOTOF™-Q II mass spectrometer (ESIMS).

**2. (a) General procedure for deprotection of THP/MOM/Ac/Ts ethers and concomitant oxidative cleavage of chalcone epoxides (1a-11a).** The chalcone epoxides (1 mmol) dissolved in water (2 mL) and 3-4 drops of acetone was added to an aqueous solution of  $\beta$ -cyclodextrin (1 mmol in 10 mL of water) at 60 °C and allowed to cool to room temperature. Then, IBX (1.1 or 2.2 mmol depending on the desired product) was added while stirring and stirring was continued for 40-60 min at 60 °C. After completion of reaction, the mixture was cooled to room temperature and extracted with EtOAc (3  $\times$  15 mL), dried, and concentrated in a vacuo. The crude product was purified by silica gel column chromatography using

hexane/ethyl acetate (8:2) as an eluent if required otherwise compounds were pure enough for the spectral elucidation.

**(b) General procedure for deprotection of THP/MOM/Ac/Ts ethers and concomitant oxidative dehydrogenation of alcohols (15a-28a).** To a solution of alcohol (15-28) in water (2 mL) and 3-4 drops of acetone was added to an aqueous solution of  $\beta$ -cyclodextrin (1 mmol in 10 mL of water) at 60 °C and allowed to cool to room temperature. Then, IBX (1.5 equiv. per alcohol or C-C bond to be oxidized) was added while stirring. The mixture was heated to 60 °C, and the reaction was constantly monitored by TLC until complete consumption of starting material was observed. The reaction mixture was cooled to room temperature and extracted with EtOAc (3  $\times$  15 mL). The organic layer was washed with 5% aq. NaHCO<sub>3</sub> and dried over anhydrous Na<sub>2</sub>SO<sub>4</sub> and concentrated in a vacuo. The crude product was purified by silica gel column chromatography using hexane/ethyl acetate (8:2) as an eluent if required otherwise compounds were pure enough for the spectral elucidation.

**(c) General procedure for deprotection of THP/MOM/Ac/Ts ethers (29a-38a).**  $\beta$ -cyclodextrin (0.1 mmol) was dissolved in water (25 ml) at 60 °C; THP/MOM/Ac/Ts ether (1 mmol) in water: acetone mixture (2 ml: 3-4 drops) was added slowly with stirring. The stirring was continued at 60 °C for the specified time (Table 5). Then the reaction mixture was cooled to room temperature and extracted with EtOAc (3  $\times$  15 mL), dried over anhydrous Na<sub>2</sub>SO<sub>4</sub> and the solvent was removed in vacuo. The crude product was purified by silica gel column chromatography using hexane/ethyl acetate (9:1) as eluent if required otherwise compounds were pure enough for the spectral elucidation.

### 3. Characterization data for representative compounds

#### 3-(4-fluorophenyl)-3-hydroxy-1-(4-hydroxyphenyl)propane-1,2-dione (**1a**)

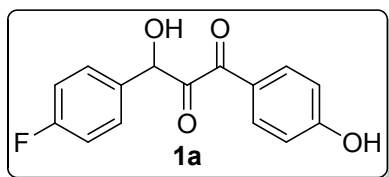

$^1\text{H}$  NMR (400 MHz,  $\text{CDCl}_3$ , ppm):  $\delta$  7.95-7.90 (m, 2H), 7.74 (dd,  $J = 2, 10$  Hz, 2H), 7.08-7.04 (m, 2H), 7.00 (dd,  $J = 2, 10$  Hz, 2H), 5.37 (s, 1H), 4.55 (s, 1H,  $\text{D}_2\text{O}$  exchangeable), 2.54 (s, 1H,  $\text{D}_2\text{O}$  exchangeable).  $^{13}\text{C}$  NMR (100 MHz,  $\text{CDCl}_3$ , ppm):  $\delta$  197.3, 191.5, 164.6, 163.1, 133.4, 132.5, 131.1, 129.0, 116.2, 115.8, 85.2. IR (KBr,  $\text{cm}^{-1}$ ): 3420, 2945, 1687, 1649. HRMS (ESIMS) for  $\text{C}_{15}\text{H}_{11}\text{FNaO}_4$  ( $\text{M}+\text{Na}$ ) $^+$  Anal. calcd. 297.0533; found 297.0531.

#### 3-hydroxy-1-(4-hydroxyphenyl)-3-(4-methoxyphenyl)propane-1,2-dione (**2a**)

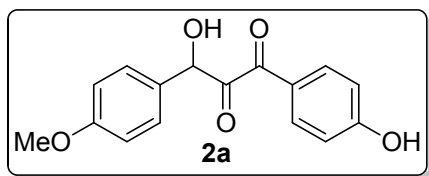

$^1\text{H}$  NMR (400 MHz,  $\text{CDCl}_3$ , ppm):  $\delta$  7.90 (dd,  $J = 2.5, 8.5$  Hz, 2H), 7.75 (dd,  $J = 2.5, 8.5$  Hz, 2H), 7.00 (dd,  $J = 2.5, 8.5$  Hz, 2H), 6.88 (dd,  $J = 2.5, 8.5$  Hz, 2H), 5.28 (s, 1H), 4.81 (s, 1H,  $\text{D}_2\text{O}$  exchangeable), 3.80 (s, 3H), 2.52 (s, 1H,  $\text{D}_2\text{O}$  exchangeable).  $^{13}\text{C}$  NMR (100 MHz,  $\text{CDCl}_3$ , ppm):  $\delta$  197.9, 191.4, 163.7, 163.2, 132.5, 130.8, 129.9, 129.0, 116.2, 113.7, 84.8, 55.5. IR (KBr,  $\text{cm}^{-1}$ ): 3422, 2940, 1685, 1647. HRMS (ESIMS) for  $\text{C}_{16}\text{H}_{14}\text{NaO}_5$  ( $\text{M}+\text{Na}$ ) $^+$  Anal. calcd. 309.0733; found 309.0730.

#### 3-(4-chlorophenyl)-3-hydroxy-1-(4-hydroxyphenyl)propane-1,2-dione (**3a**)

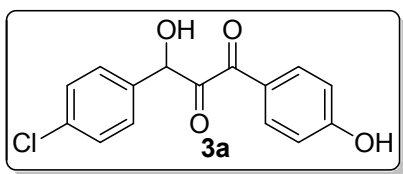

$^1\text{H}$  NMR (400 MHz,  $\text{CDCl}_3$ , ppm):  $\delta$  7.84 (dd,  $J = 2.5, 8.5$  Hz, 2H), 7.75 (dd,  $J = 2.5, 8.5$  Hz, 2H), 7.38 (dd,  $J = 2.5, 8.5$  Hz, 2H), 7.00 (dd,  $J = 2.5, 8.5$  Hz, 2H), 5.32 (s, 1H), 4.81 (s, 1H,  $\text{D}_2\text{O}$  exchangeable), 2.55 (s, 1H,  $\text{D}_2\text{O}$  exchangeable).  $^{13}\text{C}$  NMR (100 MHz,  $\text{CDCl}_3$ , ppm):  $\delta$  197.6, 191.4, 162.9, 139.7, 135.2, 132.5, 129.8, 129.1, 128.9, 116.2, 84.7. IR (KBr,  $\text{cm}^{-1}$ ): 3423, 2947, 1684, 1645. HRMS (ESIMS) for  $\text{C}_{15}\text{H}_{11}\text{ClNaO}_4$  ( $\text{M}+\text{Na}$ ) $^+$  Anal. calcd. 313.0238; found 313.0232.

### 3-(4-bromophenyl)-3-hydroxy-1-(4-hydroxyphenyl)propane-1,2-dione (4a)

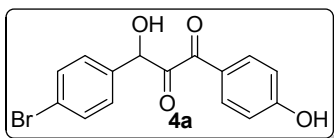

$^1\text{H}$  NMR (400 MHz,  $\text{CDCl}_3$ , ppm):  $\delta$  7.78-7.74 (m, 4H), 7.54 (dd,  $J = 2, 11$  Hz, 2H), 6.99 (d,  $J = 11$  Hz, 2H), 5.34 (s, 1H), 4.23 (s, 1H,  $\text{D}_2\text{O}$  exchangeable), 2.56 (s, 1H,  $\text{D}_2\text{O}$  exchangeable).  $^{13}\text{C}$  NMR (125 MHz,  $\text{CDCl}_3$ , ppm):  $\delta$  197.8, 191.5, 162.9, 135.6, 132.6, 131.9, 129.9, 129.2, 128.5, 116.1, 83.7. IR (KBr,  $\text{cm}^{-1}$ ): 3423, 2947, 1685, 1642. HRMS (ESIMS) for  $\text{C}_{15}\text{H}_{11}\text{BrNaO}_4$  ( $\text{M}+\text{Na}$ ) $^+$  Anal. calcd. 356.9732; found 356.9734.

### 1-(4-fluorophenyl)-3-hydroxy-3-(4-hydroxyphenyl)propane-1,2-dione (5a)

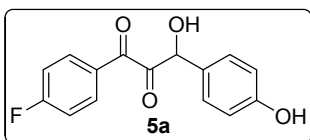

$^1\text{H}$  NMR (400 MHz,  $\text{CDCl}_3$ , ppm):  $\delta$  7.98-7.93 (m, 2H), 7.76 (dd,  $J = 2, 10$  Hz, 2H), 7.11-7.08 (m, 2H), 6.99 (dd,  $J = 2, 10$  Hz, 2H), 5.35 (s, 1H), 4.54 (s, 1H,  $\text{D}_2\text{O}$  exchangeable), 2.55 (s, 1H,  $\text{D}_2\text{O}$  exchangeable).  $^{13}\text{C}$  NMR (125 MHz,  $\text{CDCl}_3$ , ppm):  $\delta$  191.8, 191.2, 165.5, 162.8, 132.7, 132.6, 132.5, 125.8, 116.6, 116.4, 84.3. IR (KBr,  $\text{cm}^{-1}$ ): 3420, 2946, 1686, 1647. HRMS (ESIMS) for  $\text{C}_{15}\text{H}_{11}\text{FNaO}_4$  ( $\text{M}+\text{Na}$ ) $^+$  Anal. calcd. 297.0533; found 297.0535.

### 1-(4-fluorophenyl)-3-(4-hydroxyphenyl)propane-1,2,3-trione (8a)

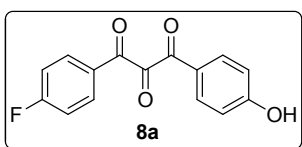

$^1\text{H}$  NMR (400 MHz,  $\text{CDCl}_3$ , ppm):  $\delta$  7.92-7.89 (m, 2H), 7.71 (dd,  $J = 1.5, 11$  Hz, 2H), 7.06-7.02 (m, 2H), 6.97 (dd,  $J = 1.5, 10.5$  Hz, 2H), 2.71 (s, 1H,  $\text{D}_2\text{O}$  exchangeable).  $^{13}\text{C}$  NMR (125 MHz,  $\text{CDCl}_3$ , ppm):  $\delta$  189.5, 166.9, 164.7, 133.4, 132.5, 131.0, 129.1, 116.1, 115.8. IR (KBr,  $\text{cm}^{-1}$ ): 3425, 2948, 1640, 1599, 1582. HRMS (ESIMS) for  $\text{C}_{15}\text{H}_9\text{FNaO}_4$  ( $\text{M}+\text{Na}$ ) $^+$  Anal. calcd. 295.0377; found 295.0372.

### 1-(4-hydroxyphenyl)-3-(4-methoxyphenyl)propane-1,2,3-trione (9a)

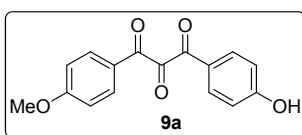

$^1\text{H}$  NMR (400 MHz,  $\text{CDCl}_3$ , ppm):  $\delta$  7.88 (dd,  $J = 2.5, 9$  Hz, 2H), 7.73 (d,  $J = 11$  Hz, 2H), 6.99 (d,  $J = 11$  Hz, 2H), 6.86 (dd,  $J = 2.5, 11$  Hz, 2H), 4.94 (s, 1H,  $\text{D}_2\text{O}$  exchangeable), 3.77 (s, 3H).  $^{13}\text{C}$

NMR (125 MHz, CDCl<sub>3</sub>, ppm):  $\delta$  188.4, 163.7, 163.2, 132.5, 130.8, 129.9, 129.0, 116.2, 113.7, 55.4. IR (KBr, cm<sup>-1</sup>): 3420, 2945, 1643, 1595, 1582. HRMS (ESIMS) for C<sub>16</sub>H<sub>12</sub>NaO<sub>4</sub> (M+Na)<sup>+</sup> Anal. calcd. 307.0576; found 307.0569.

### 1-(4-chlorophenyl)-3-(4-hydroxyphenyl)propane-1,2,3-trione (10a)

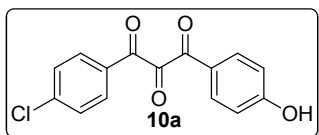

<sup>1</sup>H NMR (400 MHz, CDCl<sub>3</sub>, ppm):  $\delta$  7.84 (dd,  $J$  = 2.5, 8.5 Hz, 2H), 7.75 (dd,  $J$  = 2.5, 8.5 Hz, 2H), 7.38 (dd,  $J$  = 2.5, 8.5 Hz, 2H), 7.00 (dd,  $J$  = 2.5, 8.5 Hz, 2H), 4.81 (s, 1H, D<sub>2</sub>O exchangeable). <sup>13</sup>C NMR (125 MHz, CDCl<sub>3</sub>, ppm):  $\delta$  189.7, 162.9, 139.7, 135.2, 132.5, 129.8, 129.2, 128.9, 116.1. IR (KBr, cm<sup>-1</sup>): 3421, 2946, 1644, 1585. HRMS (ESIMS) for C<sub>15</sub>H<sub>9</sub>ClNaO<sub>4</sub> (M+Na)<sup>+</sup> Anal. calcd. 311.0081; found 311.0080.

### 1-(4-bromophenyl)-3-(4-hydroxyphenyl)propane-1,2,3-trione (11a)

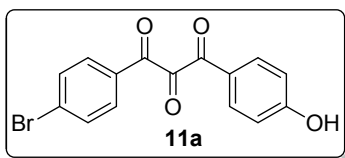

<sup>1</sup>H NMR (400 MHz, CDCl<sub>3</sub>, ppm):  $\delta$  7.83 (dd,  $J$  = 2.5, 10.5 Hz, 2H), 7.74 (dd,  $J$  = 2.5, 10.5 Hz, 2H), 7.37 (dd,  $J$  = 2.5, 10.5 Hz, 2H), 6.98 (d,  $J$  = 10.5 Hz, 2H), 4.94 (s, 1H, D<sub>2</sub>O exchangeable). <sup>13</sup>C NMR (125 MHz, CDCl<sub>3</sub>, ppm):  $\delta$  189.1, 162.8, 135.6, 132.6, 131.9, 129.9, 129.2, 128.5, 116.1. IR (KBr, cm<sup>-1</sup>): 3421, 2946, 1644, 1585. HRMS (ESIMS) for C<sub>15</sub>H<sub>9</sub>BrNaO<sub>4</sub> (M+Na)<sup>+</sup> Anal. calcd. 354.9576; found 354.9571.

### (E)-3-(4-chlorophenyl)-1-(4-hydroxyphenyl)prop-2-en-1-one (15a)

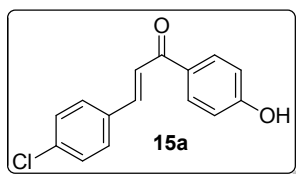

<sup>1</sup>H NMR (CDCl<sub>3</sub>, 500 MHz, ppm)  $\delta$  7.99 (d,  $J$  = 8 Hz, 2H), 7.77 (d,  $J$  = 15.5 Hz, 1H), 7.63 (t,  $J$  = 8 Hz, 2H), 7.46 (d,  $J$  = 15.5 Hz, 1H), 7.10 (t,  $J$  = 8.5 Hz, 2H), 6.95 (d,  $J$  = 8 Hz, 2H), 5.38 (s, 1H, D<sub>2</sub>O exchangeable). <sup>13</sup>C NMR (CDCl<sub>3</sub>, 125 MHz, ppm)  $\delta$  186.8, 162.0, 141.3, 131.4, 130.9, 130.8, 128.9, 121.8, 115.8, 115.2. IR (KBr,  $\nu_{\max}$  = cm<sup>-1</sup>): 3410, 2926, 2875, 1686, 1599, 1265, 1078, 862, 730. GC-MS (m/z): 302 [M<sup>+</sup>, C<sub>15</sub>H<sub>11</sub>BrO<sub>2</sub>], 304 [M+2].

**(E)-3-(4-hydroxyphenyl)-1-(4-methoxyphenyl)prop-2-en-1-one (16a)**

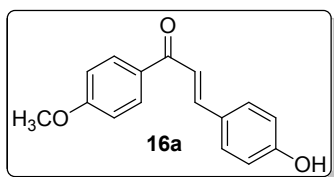

$^1\text{H}$  NMR ( $\text{CDCl}_3$ , 500 MHz, ppm)  $\delta$  8.03 (d,  $J = 8$  Hz, 2H), 7.74 (d,  $J = 15.5$  Hz, 1H), 7.56 (d,  $J = 8.5$  Hz, 2H), 7.51 (d,  $J = 16$  Hz, 1H), 7.38 (d,  $J = 8.5$  Hz, 2H), 6.98 (d,  $J = 9$  Hz, 2H), 5.48 (s, 1H,  $\text{D}_2\text{O}$  exchangeable), 3.89 (s, 3H).  $^{13}\text{C}$  NMR ( $\text{CDCl}_3$ , 125 MHz, ppm)  $\delta$  188.2, 163.9, 142.7, 131.4, 131.3, 130.1, 121.5, 116.8, 116.6, 114.2, 55.1. IR (KBr,  $\nu_{\text{max}} = \text{cm}^{-1}$ ): 3410, 2928, 2880, 1684, 1599, 1265. GC-MS ( $m/z$ ): 254 [ $\text{M}^+$ ,  $\text{C}_{16}\text{H}_{14}\text{O}_3$ ].

**(E)-1-(4-hydroxyphenyl)-3-(4-methoxyphenyl)prop-2-en-1-one (17a)**

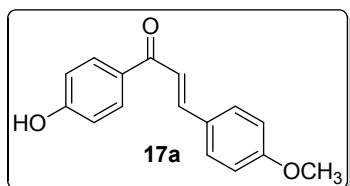

$^1\text{H}$  NMR ( $\text{CDCl}_3$ , 500 MHz, ppm)  $\delta$  8.03 (d,  $J = 8$  Hz, 2H), 7.77 (d,  $J = 16$  Hz, 1H), 7.55 (d,  $J = 8$  Hz, 2H), 7.42 (d,  $J = 15.5$  Hz, 1H), 6.98 (d,  $J = 8$  Hz, 2H), 6.89 (d,  $J = 8$  Hz, 2H), 5.82 (s, 1H,  $\text{D}_2\text{O}$  exchangeable), 3.89 (s, 3H).  $^{13}\text{C}$  NMR ( $\text{CDCl}_3$ , 125 MHz, ppm)  $\delta$  188.7, 163.6, 142.8, 131.2, 131.0, 130.4, 121.7, 116.3, 116.2, 114.0, 55.7. IR (KBr,  $\nu_{\text{max}} = \text{cm}^{-1}$ ): 3410, 2926, 2875, 1686, 1599, 1265. GC-MS ( $m/z$ ): 254 [ $\text{M}^+$ ,  $\text{C}_{16}\text{H}_{14}\text{O}_3$ ].

**(E)-1-(2-hydroxyphenyl)-3-(4-methoxyphenyl)prop-2-en-1-one (18a)**

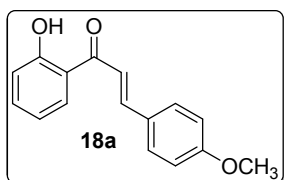

$^1\text{H}$  NMR ( $\text{CDCl}_3$ , 400 MHz, ppm)  $\delta$  7.91-7.86 (m, 2H), 7.61 (d,  $J = 8.8$  Hz, 2H), 7.52 (d,  $J = 15.6$  Hz, 1H), 7.49-7.45 (m, 2H), 7.00 (dd,  $J = 1.2, 8.8$  Hz, 1H), 6.93 (d,  $J = 8.4$  Hz, 2H), 3.84 (s, 3H), 1.68 (s, 1H,  $\text{D}_2\text{O}$  exchangeable).  $^{13}\text{C}$  NMR ( $\text{CDCl}_3$ , 100 MHz, ppm)  $\delta$  193.8, 163.7, 162.1, 145.5, 136.3, 130.7, 129.7, 127.4, 120.2, 118.9, 118.7, 117.7, 114.6, 55.6. IR (KBr,  $\nu_{\text{max}} = \text{cm}^{-1}$ ): 3410, 2926, 2875, 1686, 1599, 1265. GC-MS ( $m/z$ ): 254 [ $\text{M}^+$ ,  $\text{C}_{16}\text{H}_{14}\text{O}_3$ ].

**(E)-1-(4-chlorophenyl)-3-(2-hydroxyphenyl)prop-2-en-1-one (21a)**

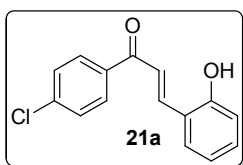

$^1\text{H}$  NMR ( $\text{CDCl}_3$ , 400 MHz, ppm)  $\delta$  7.92-7.84 (m, 2H), 7.64-7.58 (m, 3H), 7.53-7.49 (m, 1H), 7.41 (d,  $J = 8.8$  Hz, 2H), 7.01 (d,  $J = 8.4$  Hz, 1H), 6.95 (d,  $J = 7.2$  Hz, 2H), 4.84 (s, 1H,  $\text{D}_2\text{O}$  exchangeable).  $^{13}\text{C}$

NMR (CDCl<sub>3</sub>, 100 MHz, ppm)  $\delta$  193.6, 163.8, 144.1, 136.7, 133.2, 131.7, 130.0, 129.8, 129.5, 129.0, 120.7, 119.1, 118.9. IR (KBr,  $\nu_{\max}$  = cm<sup>-1</sup>): 3410, 2926, 2875, 1686, 1599, 1265. GC-MS (m/z): 258 [M<sup>+</sup>, C<sub>15</sub>H<sub>11</sub>ClO<sub>2</sub>], 260 [M+2]<sup>+</sup>.

### (E)-3-(4-bromophenyl)-1-(4-hydroxyphenyl)prop-2-en-1-one (23a)

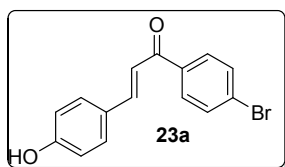

<sup>1</sup>H NMR (CDCl<sub>3</sub>, 500 MHz, ppm)  $\delta$  7.99 (d,  $J$  = 8 Hz, 2H), 7.77 (d,  $J$  = 15.5 Hz, 1H), 7.63 (t,  $J$  = 8 Hz, 2H), 7.46 (d,  $J$  = 15.5 Hz, 1H), 7.10 (t,  $J$  = 8.5 Hz, 2H), 6.95 (d,  $J$  = 8 Hz, 2H), 5.48 (s, 1H, D<sub>2</sub>O

exchangeable). <sup>13</sup>C NMR (CDCl<sub>3</sub>, 125 MHz, ppm)  $\delta$  186.88, 162.05, 141.32, 131.41, 130.90, 130.83, 128.92, 121.85, 115.81, 115.21. IR (KBr,  $\nu_{\max}$  = cm<sup>-1</sup>): 3410, 2926, 2875, 1686, 1599, 1265, 1078, 862, 730. GC-MS (m/z): 302 [M<sup>+</sup>, C<sub>15</sub>H<sub>11</sub>BrO<sub>2</sub>], 304 [M+2].

### Cyclohex-2-enone (24a)

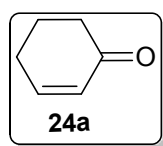

<sup>1</sup>H NMR (CDCl<sub>3</sub>, 500 MHz, ppm)  $\delta$  6.71-6.69 (m, 1H), 5.90 (d,  $J$  = 10 Hz, 1H), 2.35 (t,  $J$  = 1 Hz, 2H), 1.91-1.89 (m, 2H), 1.72-1.66 (m, 2H). <sup>13</sup>C NMR (CDCl<sub>3</sub>, 125 MHz, ppm)  $\delta$  198.1, 163.2, 127.1, 37.4, 24.5, 22.6. IR (KBr,  $\nu_{\max}$

= cm<sup>-1</sup>): 1701, 1632. GC-MS (m/z): 96 [M<sup>+</sup>, C<sub>6</sub>H<sub>8</sub>O].

### Cyclohepta-2,6-dienone (26a)

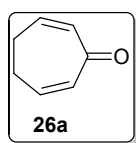

<sup>1</sup>H NMR (CDCl<sub>3</sub>, 500 MHz, ppm)  $\delta$  6.43 (d,  $J$  = 10.5 Hz, 2H), 6.31-6.29 (m, 2H), 2.34-2.26 (m, 4H). <sup>13</sup>C NMR (CDCl<sub>3</sub>, 125 MHz, ppm)  $\delta$  194.8, 144.2, 135.1, 28.1. IR (KBr,  $\nu_{\max}$  = cm<sup>-1</sup>): 1655, 1610, 1564, 1410. GC-MS (m/z): 108

[M<sup>+</sup>, C<sub>7</sub>H<sub>8</sub>O].

### 1-(4-hydroxyphenyl)-2-phenylethane-1,2-dione (27a)

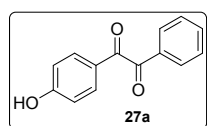

<sup>1</sup>H NMR (CDCl<sub>3</sub>, 500 MHz, ppm)  $\delta$  7.99 (d,  $J$  = 7.5 Hz, 2H), 7.64-7.48 (m, 5H), 6.98 (d,  $J$  = 7.5 Hz, 2H), 5.48 (s, 1H, D<sub>2</sub>O exchangeable). <sup>13</sup>C



NMR (CDCl<sub>3</sub>, 125 MHz, ppm)  $\delta$  191.7, 191.6, 162.6, 137.6, 134.7, 132.6, 130.7, 129.2, 124.7, 114.4. IR (KBr,  $\nu_{\max}$  = cm<sup>-1</sup>): 3410, 1686, 1640. GC-MS (m/z): 226 [M<sup>+</sup>, C<sub>14</sub>H<sub>10</sub>O<sub>3</sub>].

#### 4-hydroxybenzaldehyde (28a)

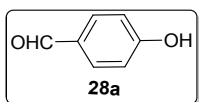

<sup>1</sup>H NMR (CDCl<sub>3</sub>, 500 MHz, ppm)  $\delta$  9.91 (s, 1H, D<sub>2</sub>O exchangeable), 7.35 (d,  $J$  = 7.5 Hz, 2H), 6.94 (d,  $J$  = 8 Hz, 2H), 3.90 (s, 1H). <sup>13</sup>C NMR (CDCl<sub>3</sub>, 125 MHz, ppm)  $\delta$  192.9, 163.0, 134.7, 130.2, 117.1. IR (KBr,  $\nu_{\max}$  = cm<sup>-1</sup>): 3420, 2927, 2873, 1721. GC-MS (m/z): 122 [M<sup>+</sup>, C<sub>7</sub>H<sub>6</sub>O<sub>2</sub>].

#### 2,6-diphenyltetrahydro-2H-pyran-4-yl 4-methylbenzenesulfonate (32)

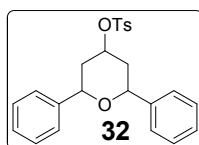

<sup>1</sup>H NMR (500 MHz, CDCl<sub>3</sub>, ppm):  $\delta$  7.88 (d,  $J$  = 8Hz, 2H), 7.43-7.37 (m, 10H), 7.34-7.31 (m, 2H), 5.03 (tt,  $J$  = 4.5 and 11.5Hz, 1H), 4.59 (d,  $J$  = 11.5Hz, 2H), 2.48 (s, 3H), 2.34 (dd,  $J$  = 4.5, 12.5Hz, 2H), 1.88 (q,  $J$  = 12.5Hz, 2H). <sup>13</sup>C NMR (125 MHz, CDCl<sub>3</sub>, ppm):  $\delta$  144.7, 140.9, 134.2, 129.8, 128.3, 127.7, 127.5, 125.7, 78.1, 77.4, 61.2, 39.9, 21.5. IR (KBr, cm<sup>-1</sup>): 3056, 3039, 2923, 2852, 2373, 1717, 1629, 1454, 1379, 1178, 1065, 945, 903, 757, 699.

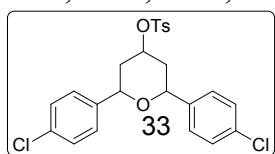

#### 2,6-bis(4-chlorophenyl)tetrahydro-2H-pyran-4-yl 4-methylbenzenesulfonate (33)

<sup>1</sup>H NMR (500 MHz, CDCl<sub>3</sub>, ppm):  $\delta$  7.80 (d,  $J$  = 8Hz, 2H), 7.35-7.27 (m, 10H), 4.93 (tt,  $J$  = 4.5, 11Hz, 1H), 4.50 (dd,  $J$  = 1.5, 11.5 Hz, 2H), 2.44 (s, 3H), 2.26 (dd,  $J$  = 4.5, 11.5Hz, 2H), 1.75 (q,  $J$  = 11.5Hz, 2H). <sup>13</sup>C NMR (125 MHz, CDCl<sub>3</sub>, ppm):  $\delta$  145.0, 139.3, 134.2, 133.7, 130.0, 128.7, 127.6, 127.2, 77.6, 76.8, 39.9, 21.7.

#### (E)-2-(4-chlorophenyl)-6-(4-(3-(4-fluorophenyl)-3-oxoprop-1-en-1-yl)phenyl)tetrahydro-2H-pyran-4-yl 4-methylbenzenesulfonate (34)

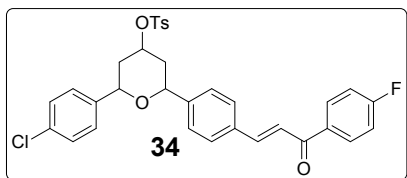

<sup>1</sup>H NMR (500 MHz, CDCl<sub>3</sub>, ppm): δ 8.02-8.05 (m, 4H), 7.81 (d, *J* = 8.5 Hz, 1H), 7.78 (d, *J* = 5 Hz, 1H), 7.75 (d, *J* = 5 Hz, 1H), 7.60 (dd, *J* = 8, 2.5 Hz, 4H), 7.47 (d, *J* = 15.5 Hz, 2H), 7.39 (dd, *J* = 8.5, 3 Hz, 3H), 7.33 (d, *J* = 8 Hz, 2H), 4.96 (tt, *J* = 11, 4.5 Hz, 1H), 4.56-4.49 (m, 2H), 2.43 (s, 3H), 2.25-2.33 (m, 2H), 1.76-1.83 (m, 2H). <sup>13</sup>C NMR (125 MHz, CDCl<sub>3</sub>, ppm): δ 188.8, 164.6, 146.9, 144.8, 143.4, 139.3, 134.3, 134.1, 133.8, 133.6, 131.7, 131.1, 130.0, 128.6, 128.6, 127.6, 127.2, 126.4, 121.2, 77.6, 77.3, 76.9, 39.8, 39.8, 21.7. IR (KBr, cm<sup>-1</sup>): 3000, 2945, 1678, 1614, 1350, 1200, 1121, 861. HRMS (ESIMS) for C<sub>33</sub>H<sub>28</sub>ClFNaO<sub>5</sub>S (M+Na)<sup>+</sup> Anal. calcd. 613.1228; found 613.1220.

**(E)-2-(4-bromophenyl)-6-(4-(3-(4-bromophenyl)-3-oxoprop-1-en-1-yl)phenyl)tetrahydro-2H-pyran-4-yl 4-methylbenzenesulfonate (35)**

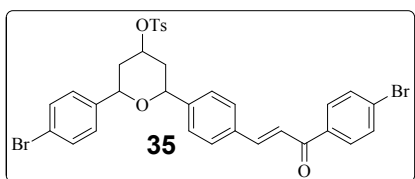

<sup>1</sup>H NMR (500MHz, CDCl<sub>3</sub>, ppm): δ 7.86 (dd, *J* = 8.5, 2Hz, 4H), 7.60 (dd, *J* = 10.5, 8.5 Hz, 6H), 7.39-7.46 (m, 6H), 7.33 (d, *J* = 8 Hz, 1H), 7.22 (d, *J* = 8.5 Hz, 1H), 4.95 (tt, *J* = 6.5, 3Hz, 1H), 4.52 (dd, *J* = 28, 10 Hz, 2H), 2.43 (s, 3H), 2.29 (dd, *J* = 24, 12.5Hz, 2H), 1.77 (q, *J* = 11 Hz, 2H). <sup>13</sup>C NMR (125 MHz, CDCl<sub>3</sub>, ppm): δ 189.18, 146.84, 143.35, 139.67, 136.75, 133.91, 133.67, 131.78, 131.46, 129.90, 128.50, 127.46, 127.42, 126.33, 121.03, 118.61, 77.43, 76.73, 72.70, 39.65, 21.55. IR (KBr, cm<sup>-1</sup>): 3000, 2945, 1678, 1614, 1350, 1200, 1121, 861. HRMS (ESIMS) for C<sub>33</sub>H<sub>28</sub>Br<sub>2</sub>NaO<sub>5</sub>S (M+Na)<sup>+</sup> Anal. calcd. 716.9922; found 716.9900.

**(c) Spectral data of OTs deprotected product:**

**2,6-diphenyltetrahydro-2H-pyran-4-ol (32a)**

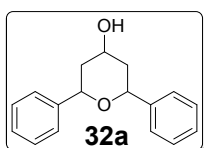

<sup>1</sup>H NMR (500 MHz, CDCl<sub>3</sub>, ppm): δ 7.19-7.41 (m, 8H), 4.51-4.43 (m, 2H), 4.07 (tt, *J* = 4.5, 11.5 Hz, 1H), 2.28 (s, br, D<sub>2</sub>O exchangeable, 1H, OH), 2.21 (dd, *J* = 4, 11.5Hz, 2H), 1.53 (q, *J* = 11.5 Hz, 2H). <sup>13</sup>C NMR (125

MHz, CDCl<sub>3</sub>, ppm):  $\delta$  131.4, 128.3, 127.5, 125.8, 77.8, 68.6, 42.9. IR (KBr, cm<sup>-1</sup>): 3433, 2965, 2921, 2852, 1634, 1452, 1382, 1265, 1156, 1065, 900, 760, 700. GC-MS (m/z): 410 [M<sup>+</sup>, C<sub>17</sub>H<sub>18</sub>O<sub>2</sub>].

**2,6-bis(4-chlorophenyl)tetrahydro-2H-pyran-4-ol (33a)**

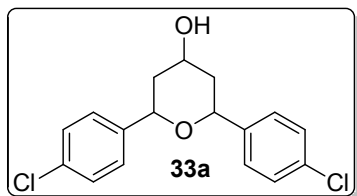

<sup>1</sup>H NMR (500 MHz, CDCl<sub>3</sub>, ppm):  $\delta$  7.29-7.24 (m, 8H), 4.47 (d, *J* = 11.5 Hz, 2H), 4.06 (tt, *J* = 4.5, 11.5 Hz, 1H), 2.19 (dd, *J* = 4, 11.5 Hz, 2H), 1.48 (q, *J* = 11.5 Hz, 2H). <sup>13</sup>C NMR (125

MHz, CDCl<sub>3</sub>, ppm):  $\delta$  139.2, 132.3, 127.5, 126.2, 77.8, 67.4, 41.9. IR (KBr, cm<sup>-1</sup>): 3447, 2960, 2886, 1652, 1543, 1088, 804. GC-MS (m/z): 323 [M<sup>+</sup>, C<sub>17</sub>H<sub>16</sub>Cl<sub>2</sub>O<sub>2</sub>].

**(E)-3-(4-(6-(4-chlorophenyl)-4-hydroxytetrahydro-2H-pyran-2-yl)phenyl)-1-(4-fluorophenyl)prop-2-en-1-one (34a)**

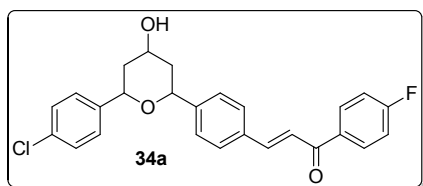

<sup>1</sup>H NMR (500 MHz, CDCl<sub>3</sub>, ppm):  $\delta$  8.18 (d, *J* = 8 Hz, 1H), 7.95 (d, *J* = 8 Hz, 2H), 7.59 (d, *J* = 9 Hz, 3H), 7.48 (d, *J* = 8 Hz, 2H), 7.41 (d, *J* = 9 Hz, 2H), 7.36 (d, *J* = 8.5

Hz, 2H), 7.01 (d, *J* = 9 Hz, 2H), 4.66 (t, *J* = 3 Hz, 2H), 4.14 (tt, *J* = 11, 3 Hz, 1H), 2.22-2.85 (m, 2H), 2.04 (s, br, D<sub>2</sub>O exchangeable, 1H), 1.73-1.84 (m, 2H). <sup>13</sup>C NMR (125 MHz, CDCl<sub>3</sub>, ppm):  $\delta$  188.8, 166.7, 164.6, 144.6, 143.7, 140.8, 134.5, 134.3, 131.2, 130.0, 128.7, 127.7, 126.5, 125.9, 121.6, 115.9, 78.0, 77.7, 69.4, 40.0. IR (KBr, cm<sup>-1</sup>): 3434, 3010, 2922, 2843, 1734, 1626, 1456, 1256, 1069, 808.8. HRMS (ESIMS): for C<sub>26</sub>H<sub>22</sub>ClFNaO<sub>3</sub> (M+Na)<sup>+</sup> Anal. calcd. 459.1139; found 459.1150.

**(E)-1-(4-bromophenyl)-3-(4-(6-(4-bromophenyl)-4-hydroxytetrahydro-2H-pyran-2-yl)phenyl)prop-2-en-1-one (35a)**

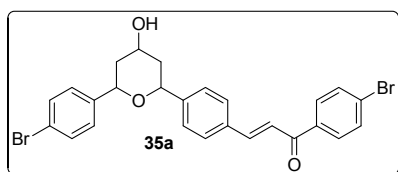

<sup>1</sup>H NMR (500 MHz, CDCl<sub>3</sub>, ppm):  $\delta$  7.88 (d, *J* = 8 Hz, 2H), 7.82 (d, *J* = 8.5 Hz, 2H), 7.78 (s, 1H), 7.61-7.66 (m, 4H), 7.47 (s, 1H), 7.35 (d, *J* = 8 Hz, 2H), 7.31-7.32 (m, 2H), 4.45

(d,  $J = 32$ , 11.5 Hz, 2H), 4.07 (tt,  $J = 10.5$ , 3 Hz, 1H), 2.30-2.35 (m, 2H), 2.20 (s, br, D<sub>2</sub>O exchangeable, 1H), 1.77-1.86 (m, 2H). <sup>13</sup>C NMR (125 MHz, CDCl<sub>3</sub>, ppm):  $\delta$  189.8, 143.7, 140.7, 135.4, 134.4, 134.1, 129.8, 129.2, 128.5, 128.4, 127.8, 127.5, 126.2, 125.7, 122.0, 77.8, 77.4, 67.2, 39.8. IR (KBr, cm<sup>-1</sup>): 3454, 2961, 2878, 1651, 1541, 1091, 801. HRMS (ESIMS): for C<sub>26</sub>H<sub>22</sub>Br<sub>2</sub>NaO<sub>3</sub> (M+Na)<sup>+</sup> Anal. calcd. 562.9833; found 562.9853.

### 2-(4-(4-hydroxy-6-phenyltetrahydro-2H-pyran-2-yl)phenyl)-4H-chromen-4-one (36a)

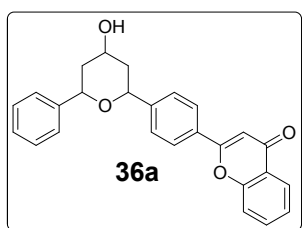

<sup>1</sup>H NMR (500 MHz, CDCl<sub>3</sub>, ppm):  $\delta$  7.74 (d,  $J = 8$  Hz, 2H), 7.37 (dd,  $J = 6$ , 3 Hz, 2H), 7.27 (d,  $J = 8.5$  Hz, 2H), 7.17-7.21 (m, 3H), 7.15 (d,  $J = 8.5$  Hz, 2H), 6.92 (s, 1H), 6.79 (dd,  $J = 6.5$ , 3 Hz, 2H), 4.40 (t,  $J = 11.5$  Hz, 2H), 3.90 (tt,  $J = 11$ , 3 Hz, 1H), 2.15-2.22 (m, 2H), 1.68-1.77 (m, 2H). <sup>13</sup>C NMR (125 MHz, CDCl<sub>3</sub>, ppm):  $\delta$  190.0, 163.0, 156.0, 139.8, 135.5, 134.1, 131.6, 129.9, 129.3, 128.6, 128.6, 127.6, 127.5, 126.3, 122.2, 121.8, 77.1, 76.9, 65.0, 39.8, 39.7. IR (KBr, cm<sup>-1</sup>): 3446, 2971, 2880, 1652, 1513, 1208, 799. HRMS (ESIMS): for C<sub>26</sub>H<sub>21</sub>NaO<sub>4</sub> (M+Na)<sup>+</sup> Anal. calcd. 421.1416; found 421.1441.

#### 4. $^1\text{H}$ and $^{13}\text{C}$ NMR Spectra of representative compounds.

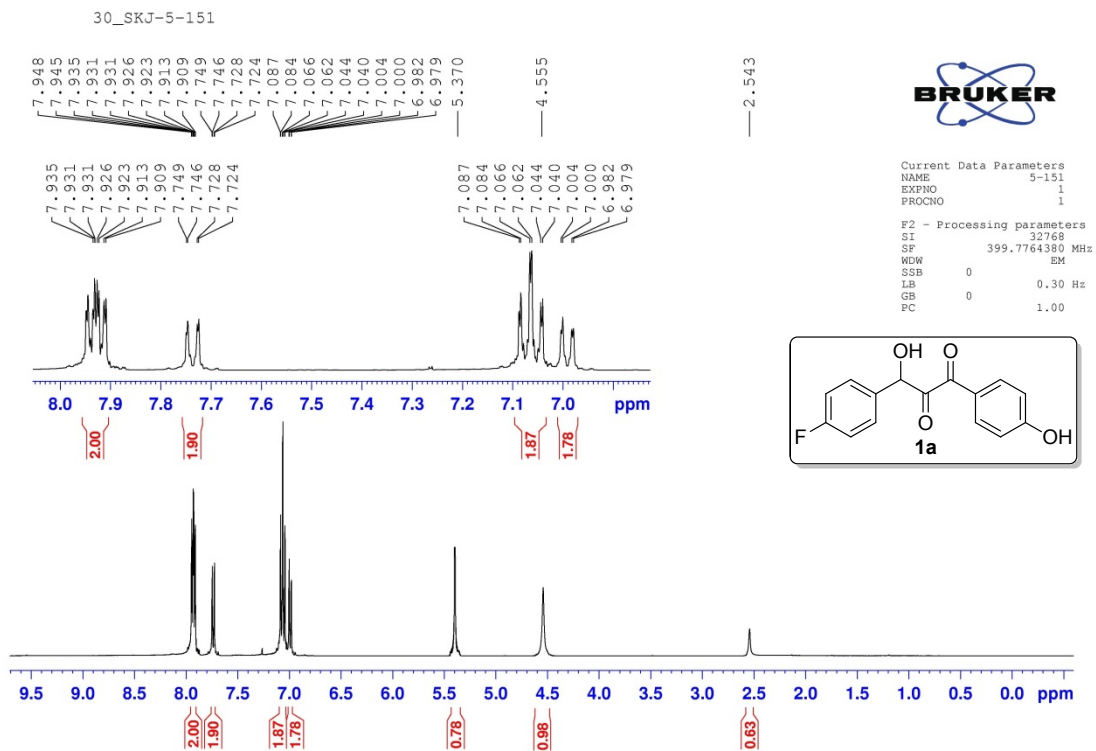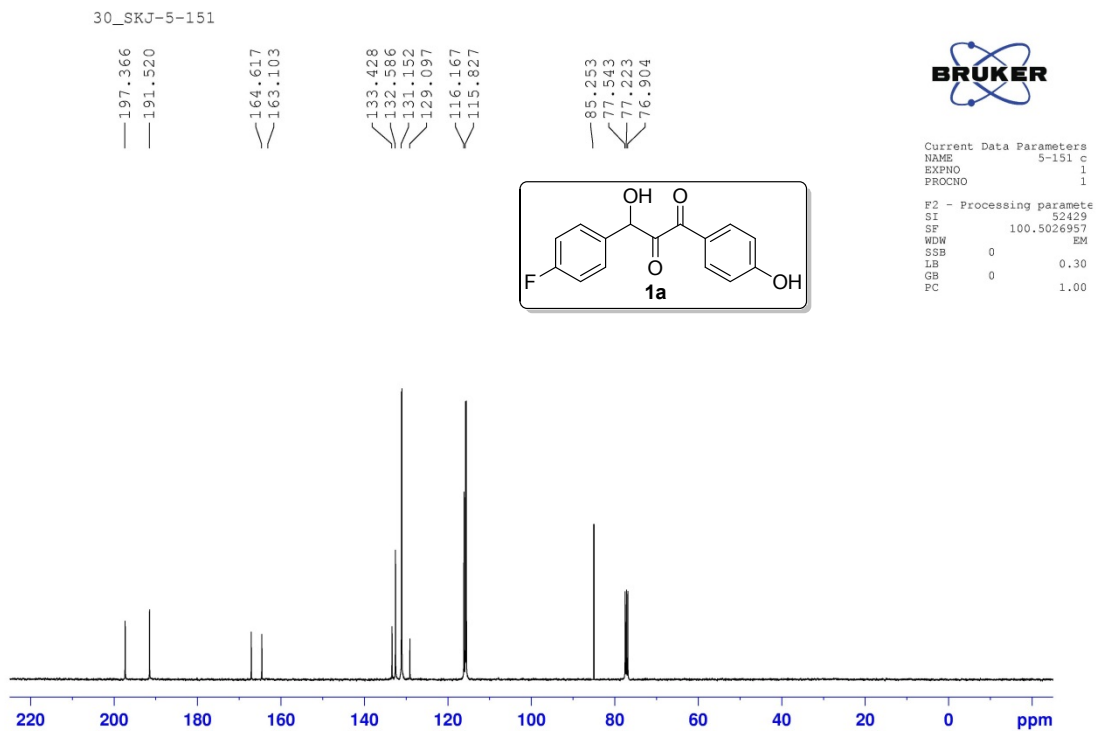

30\_SKJ-5-152

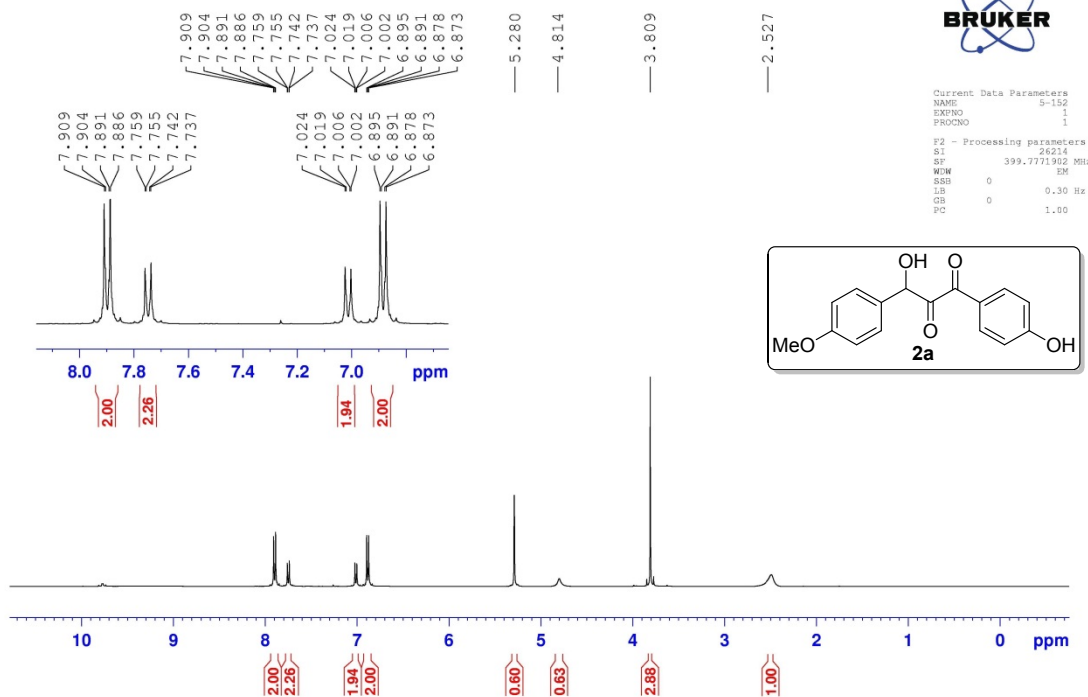

30\_SKJ-5-152

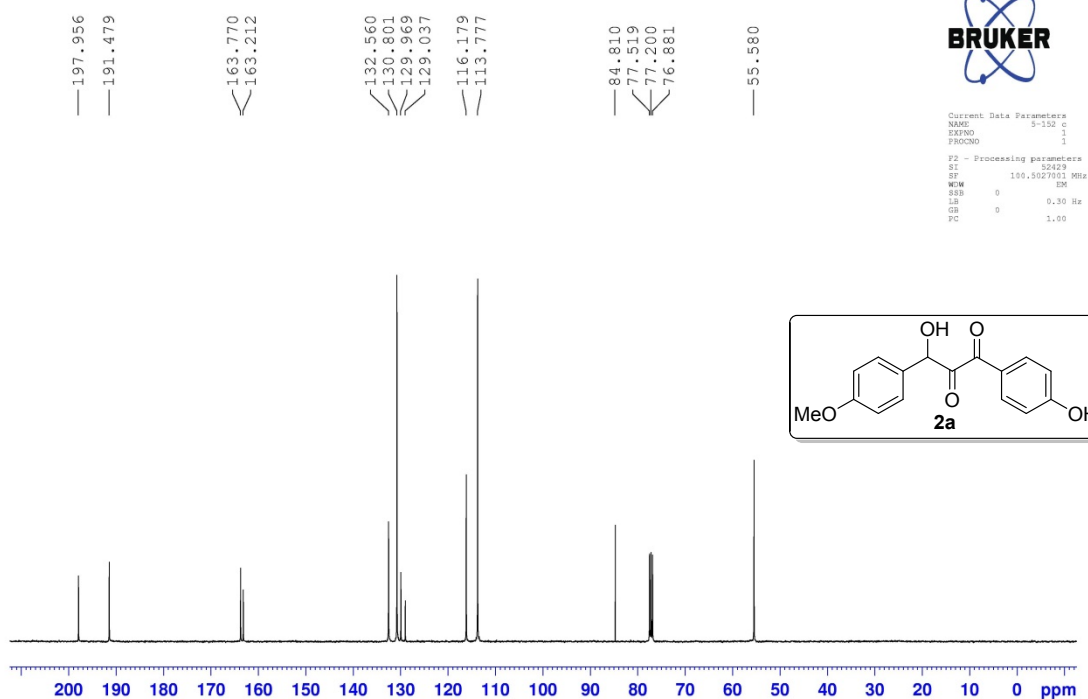

30\_SKJ-5-153

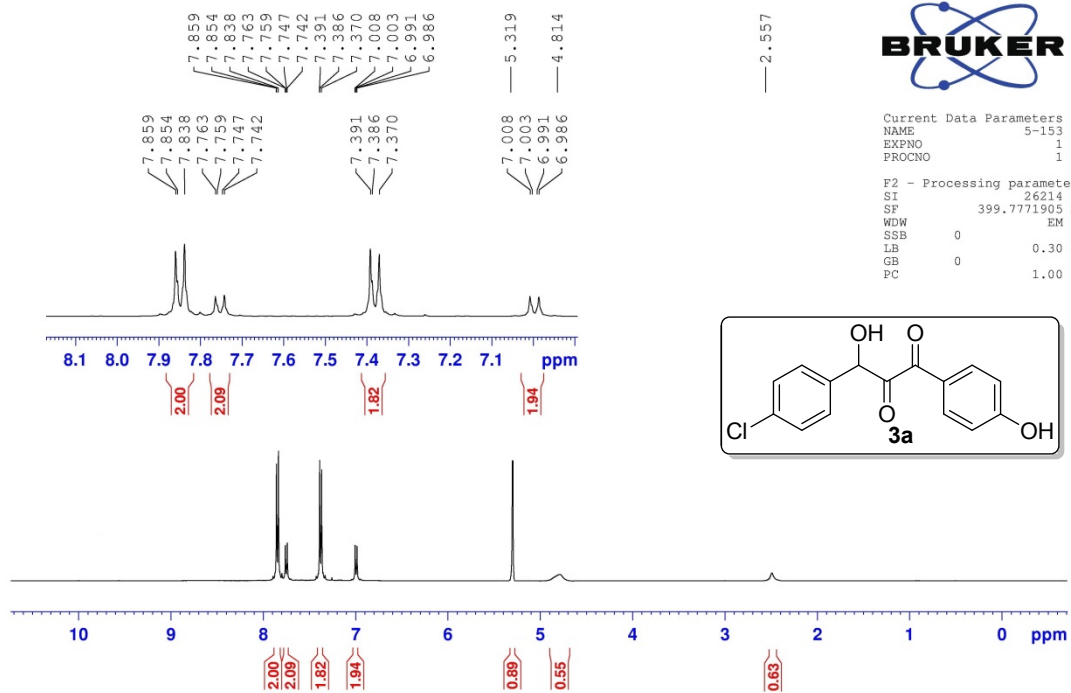

30\_SKJ-5-153

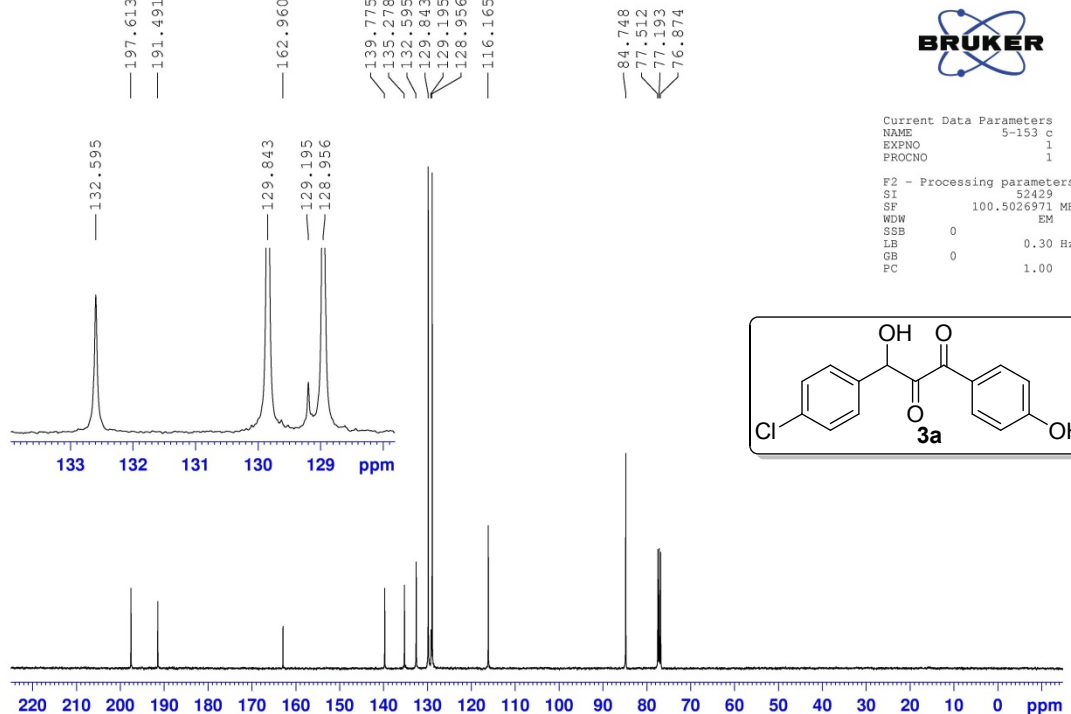

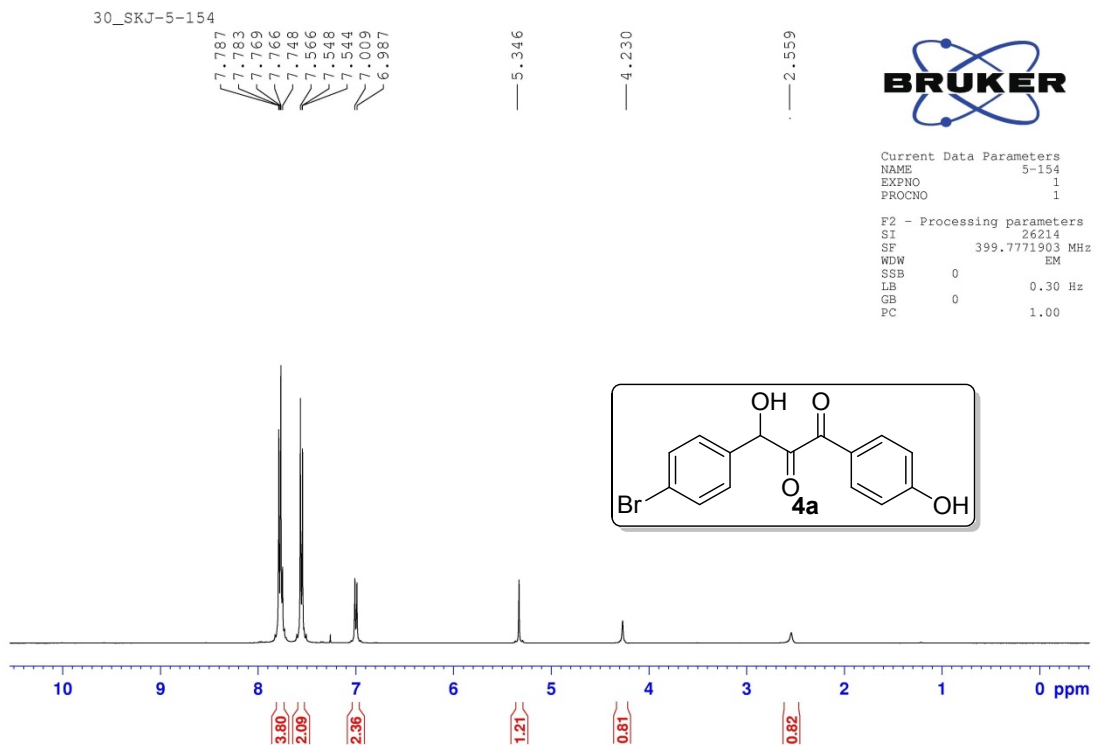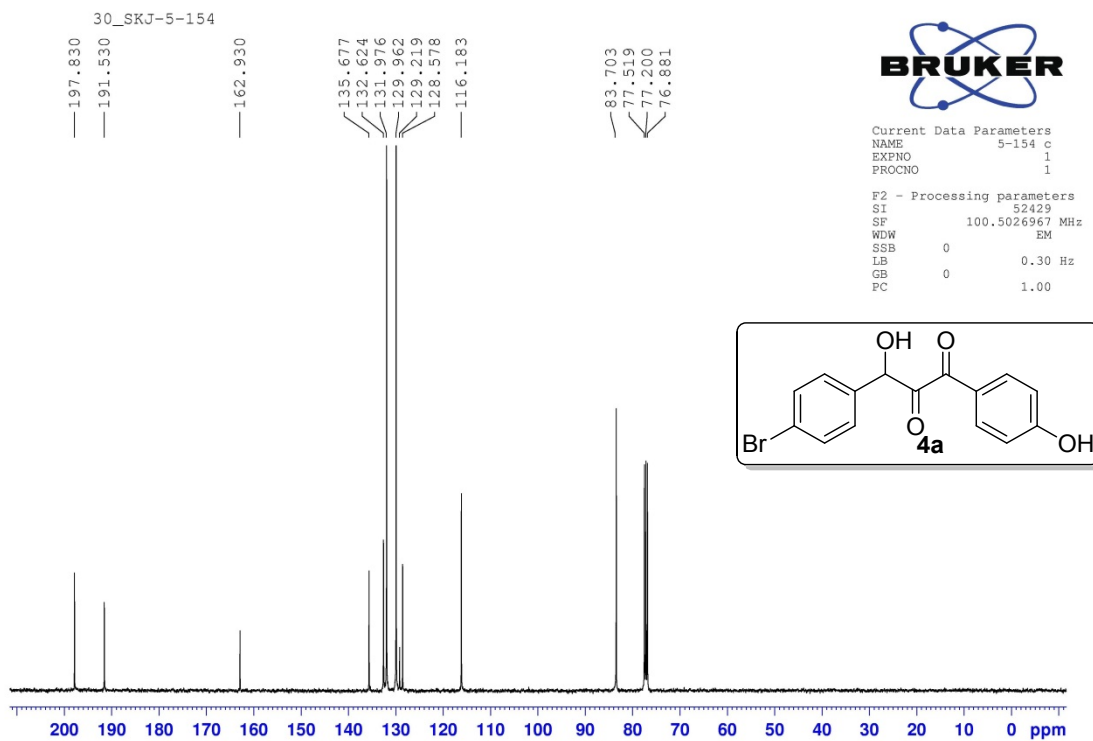



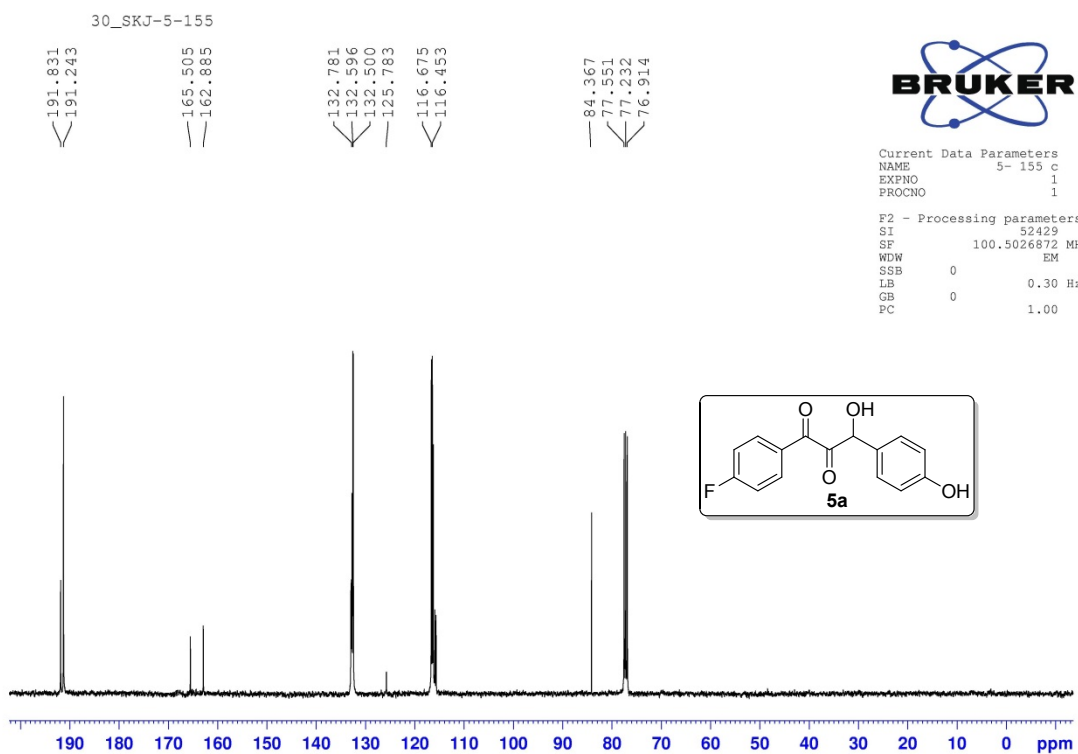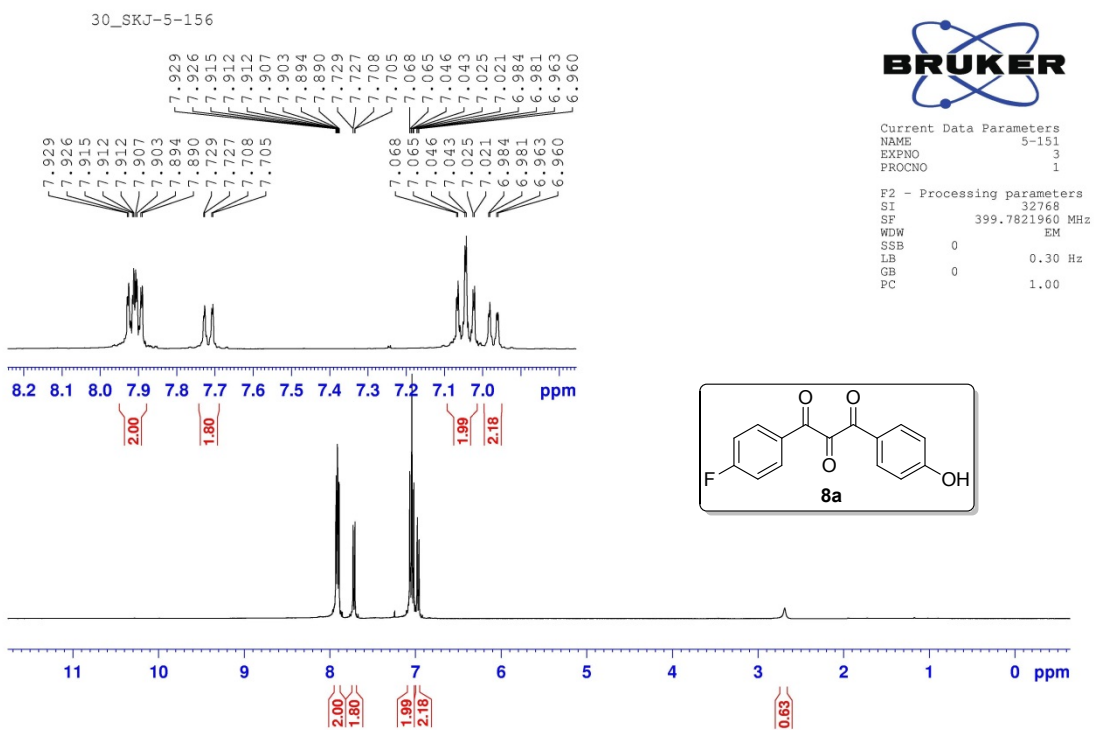

30\_SKJ-5-156

189.549  
166.962  
164.748  
133.431  
132.599  
131.061  
129.131  
116.170  
115.830  
77.545  
77.226  
76.907

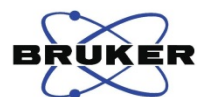

Current Data Parameters  
NAME 5-151 c  
EXPNO 2  
PROCNO 1

F2 - Processing parameters  
SI 52429  
SF 100.5026954 MHz  
WDW EM  
SSB 0  
LB 0.30 Hz  
GB 0  
PC 1.00

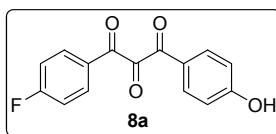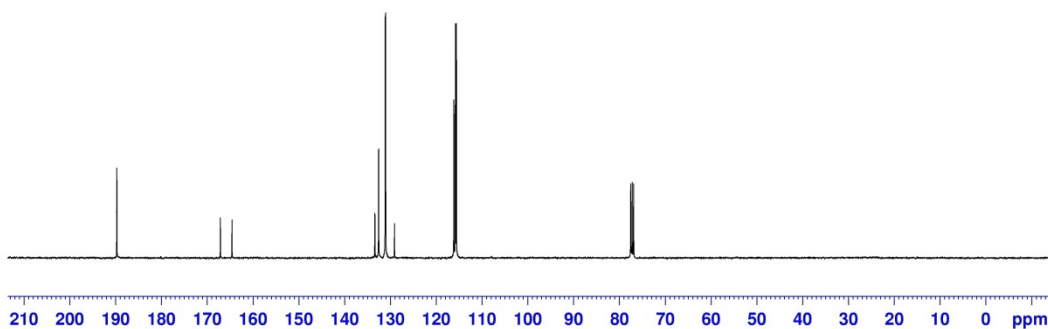

30\_SKJ-5-157

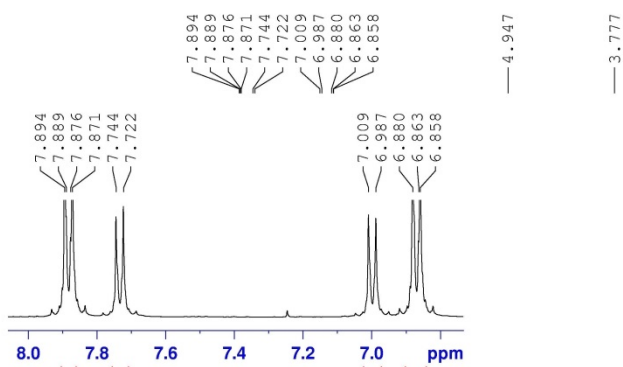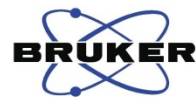

Current Data Parameters  
NAME 5-157  
EXPNO 2  
PROCNO 1

F2 - Processing parameters  
SI 26214  
SF 399.7821960 MHz  
WDW EM  
SSB 0  
LB 0.30 Hz  
GB 0  
PC 1.00

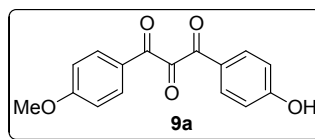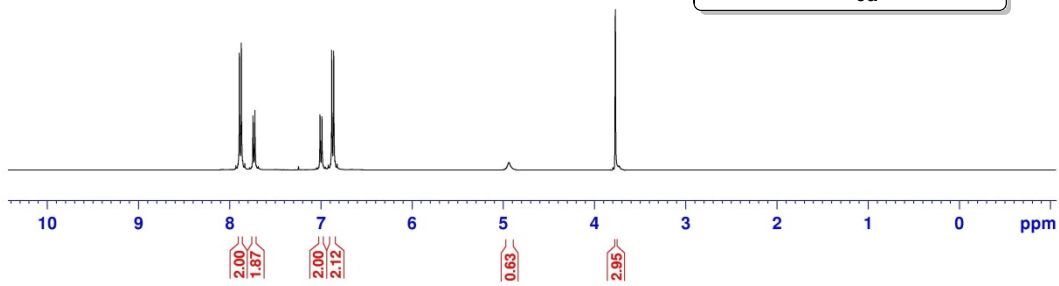

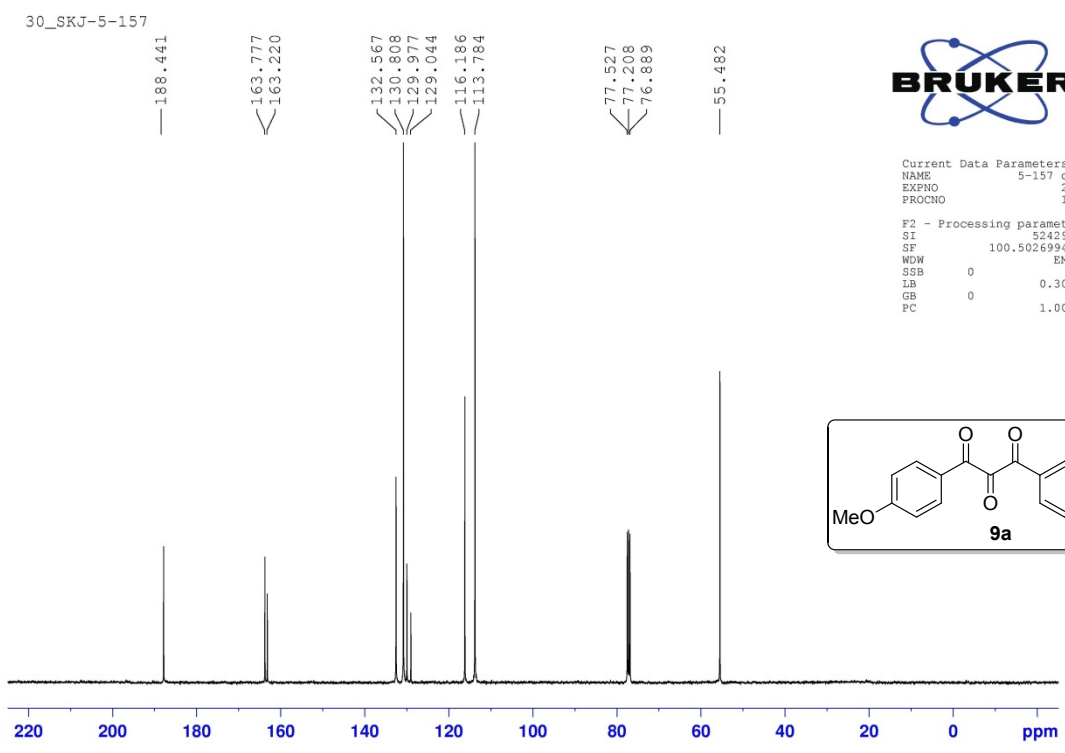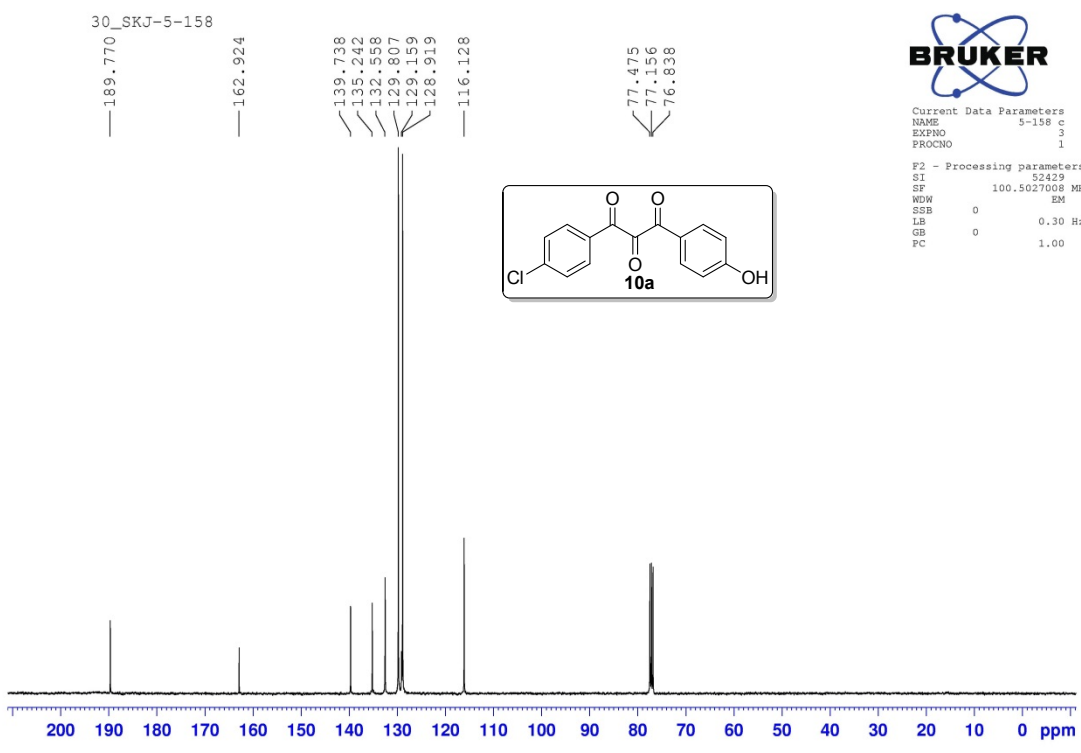

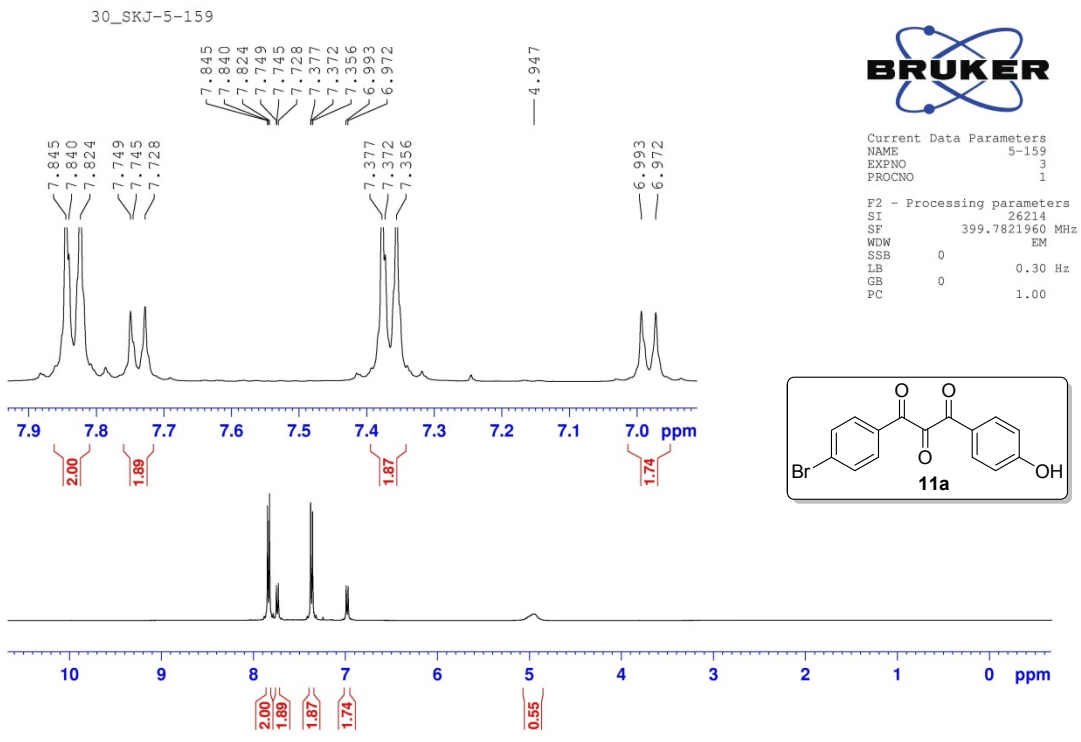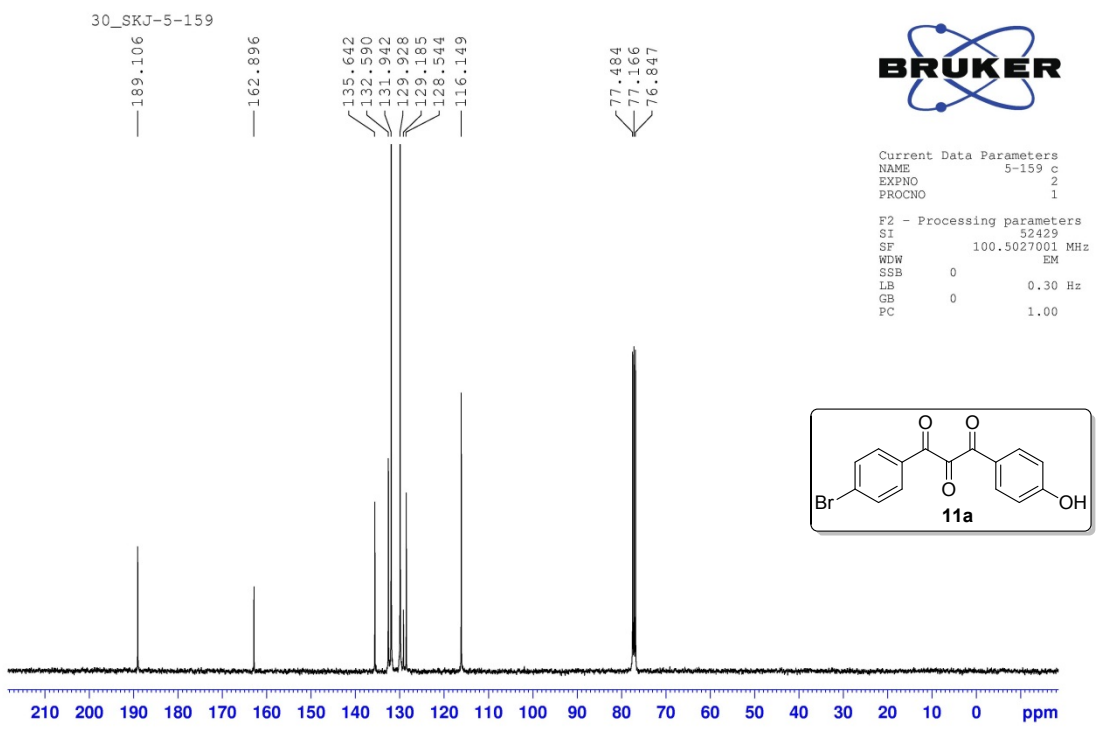

skj-Yb-1

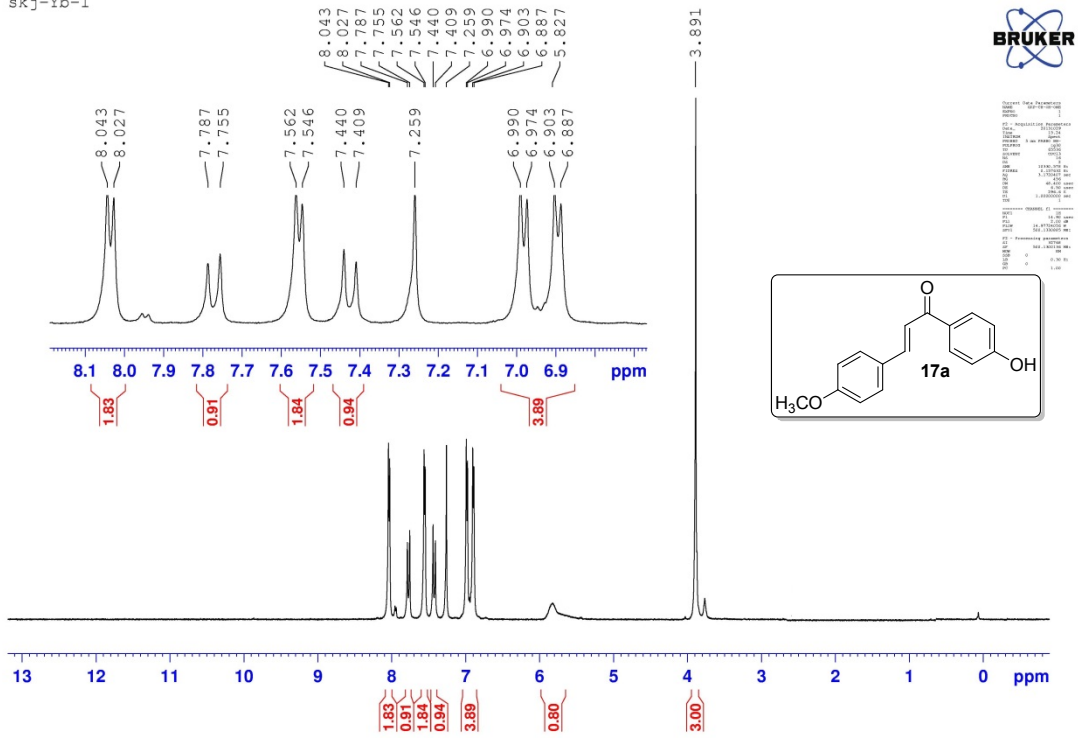

skj-yb-3 c13

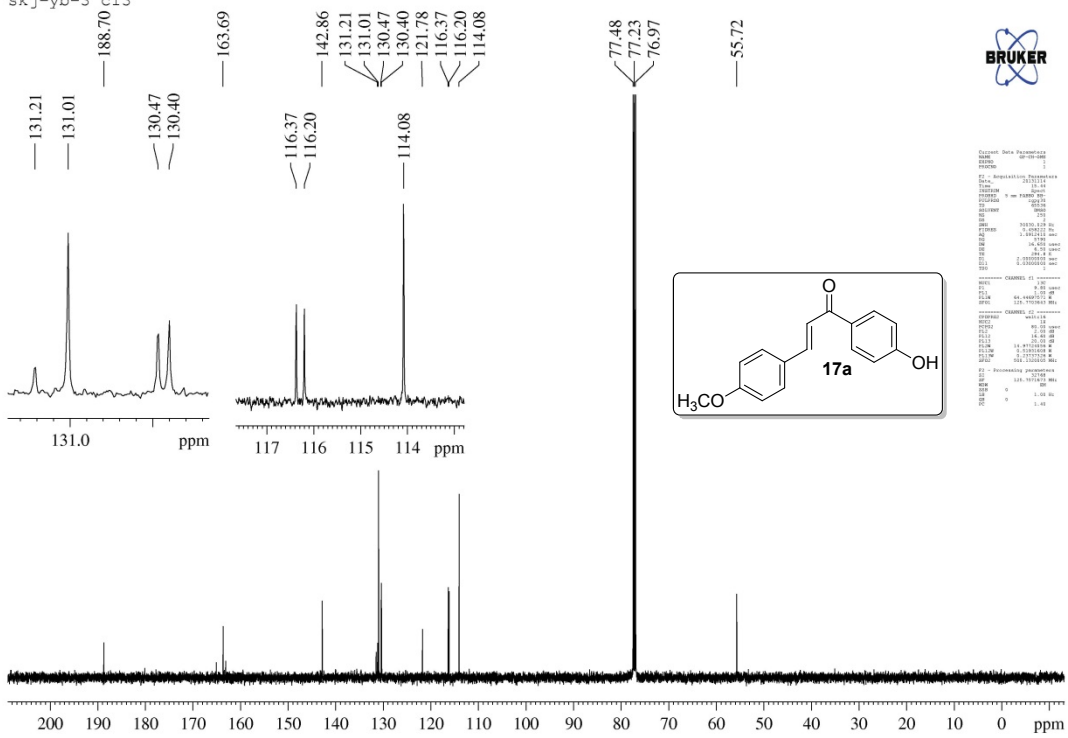

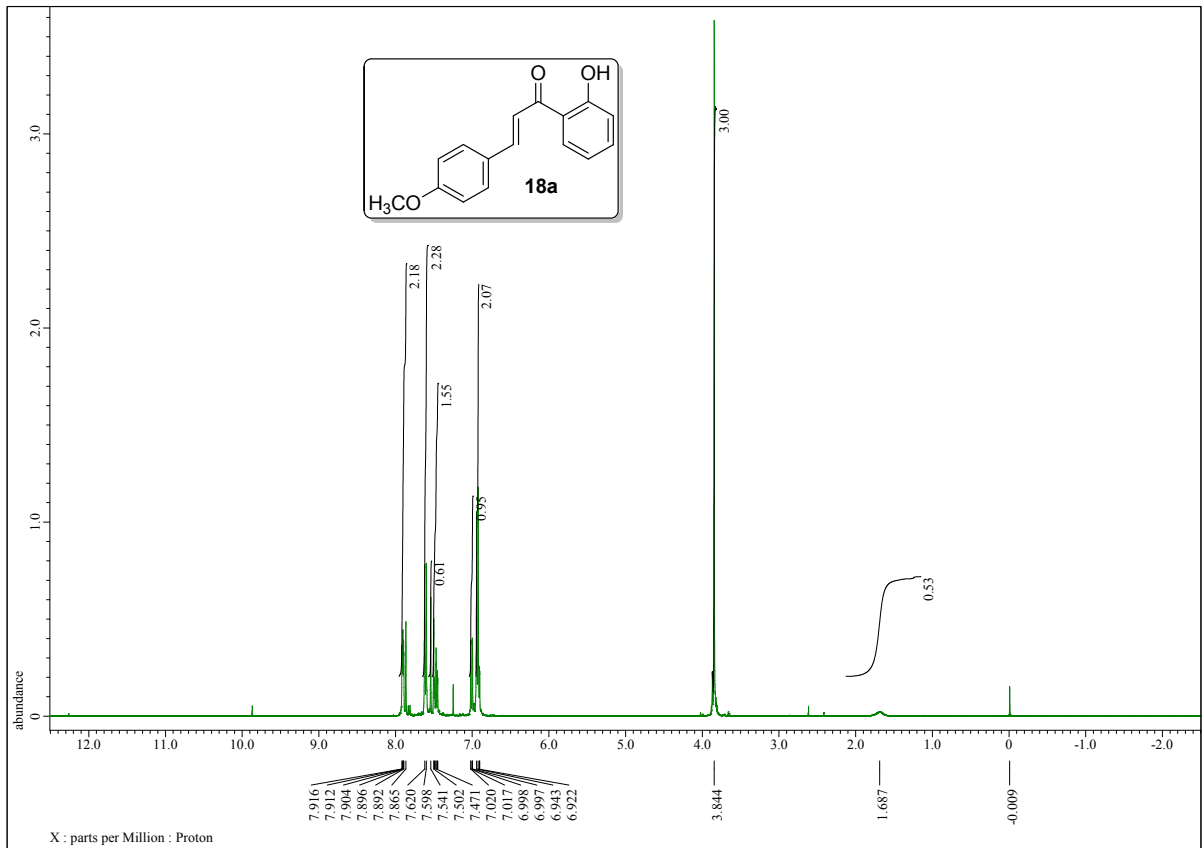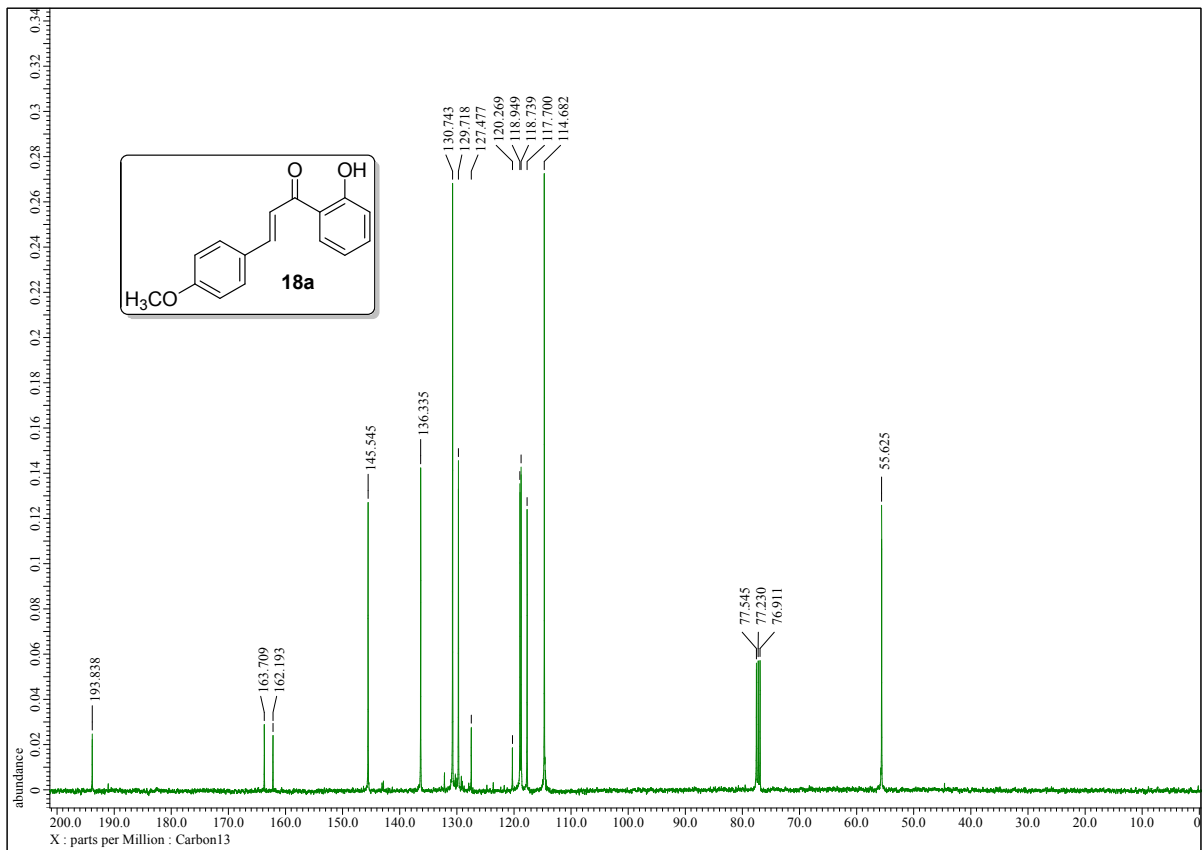

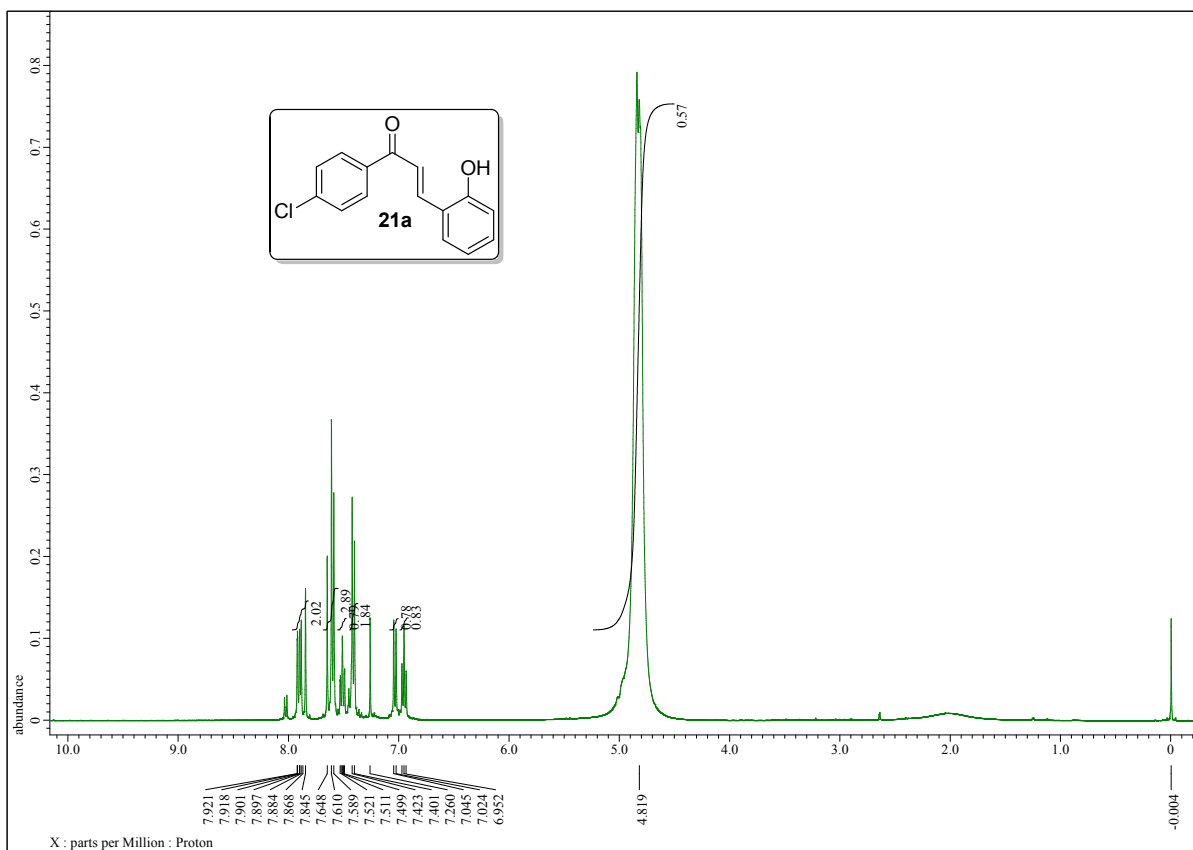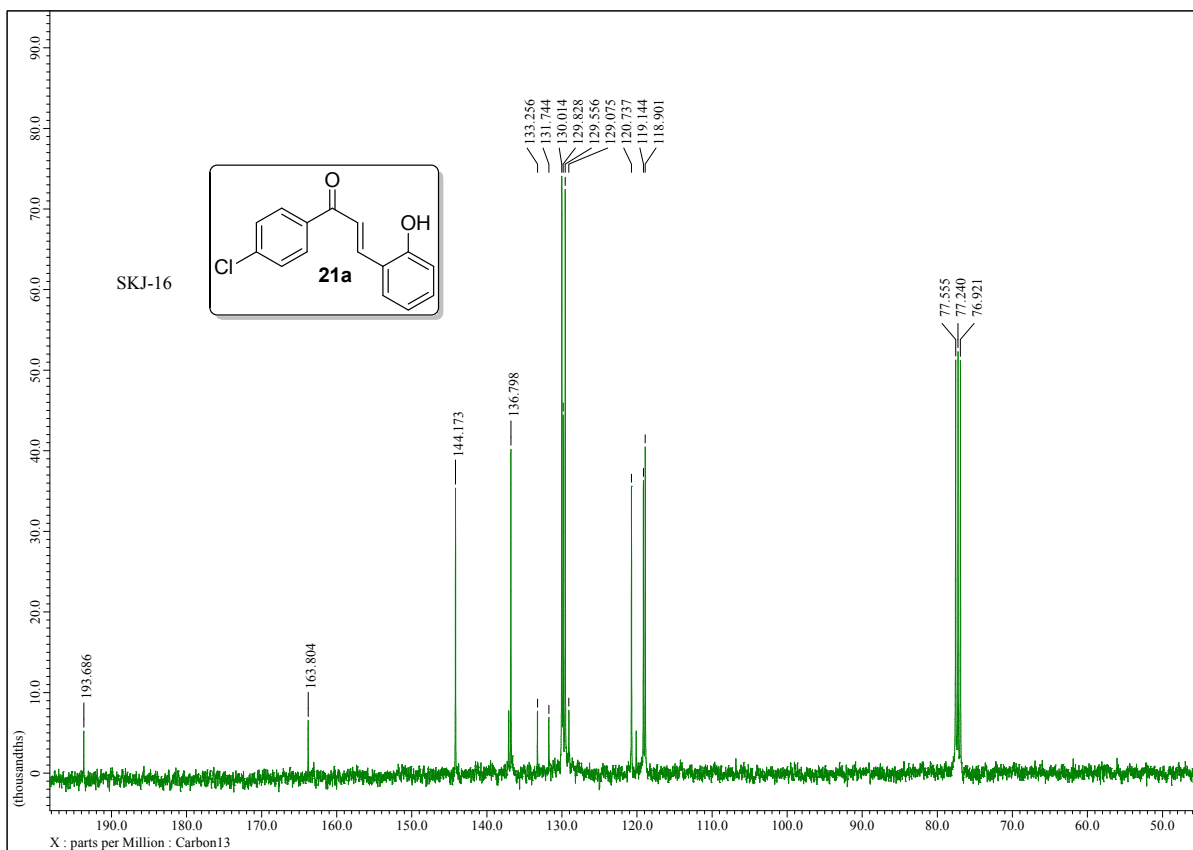

SKJ-YB-3

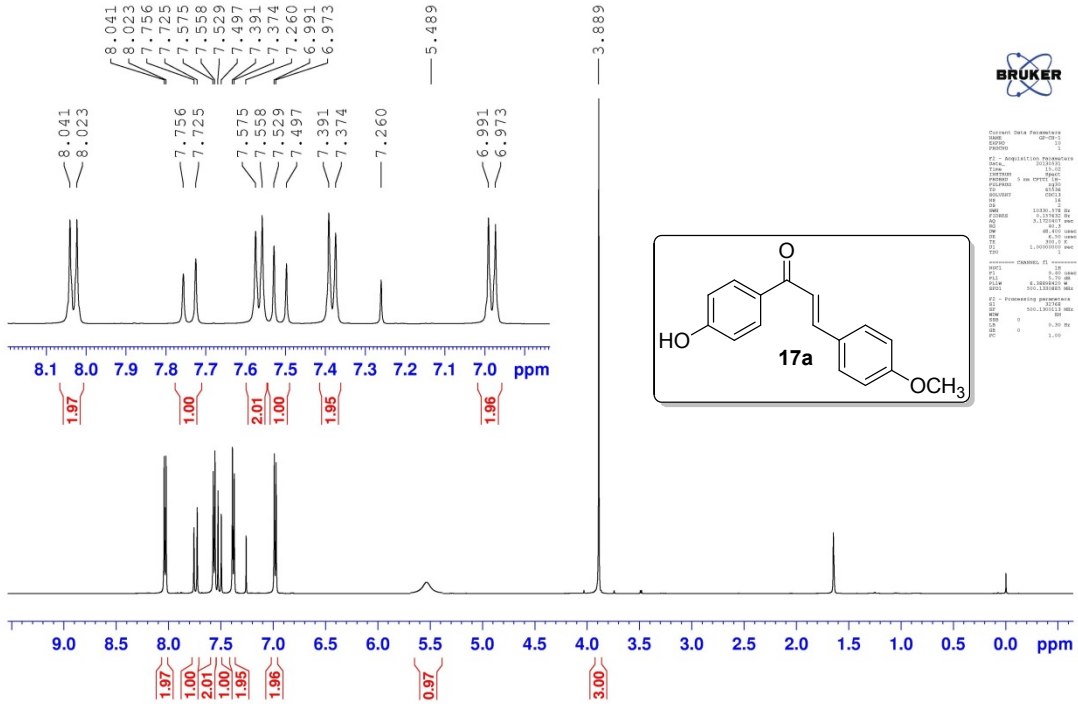

69

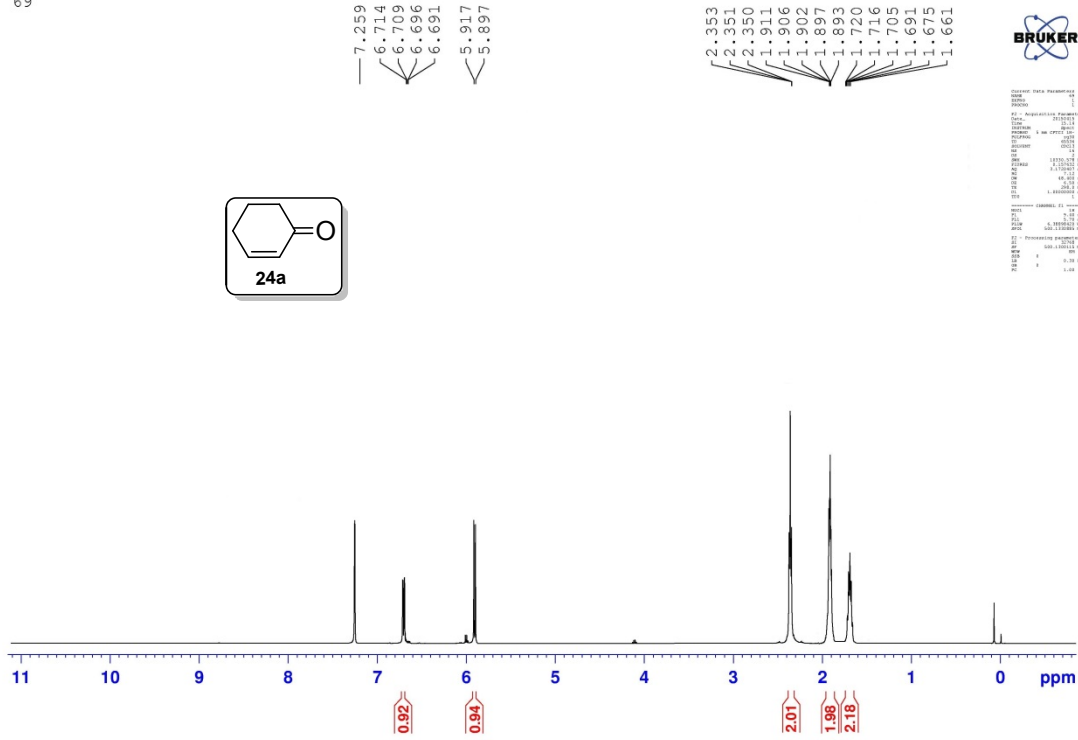



SK-71C

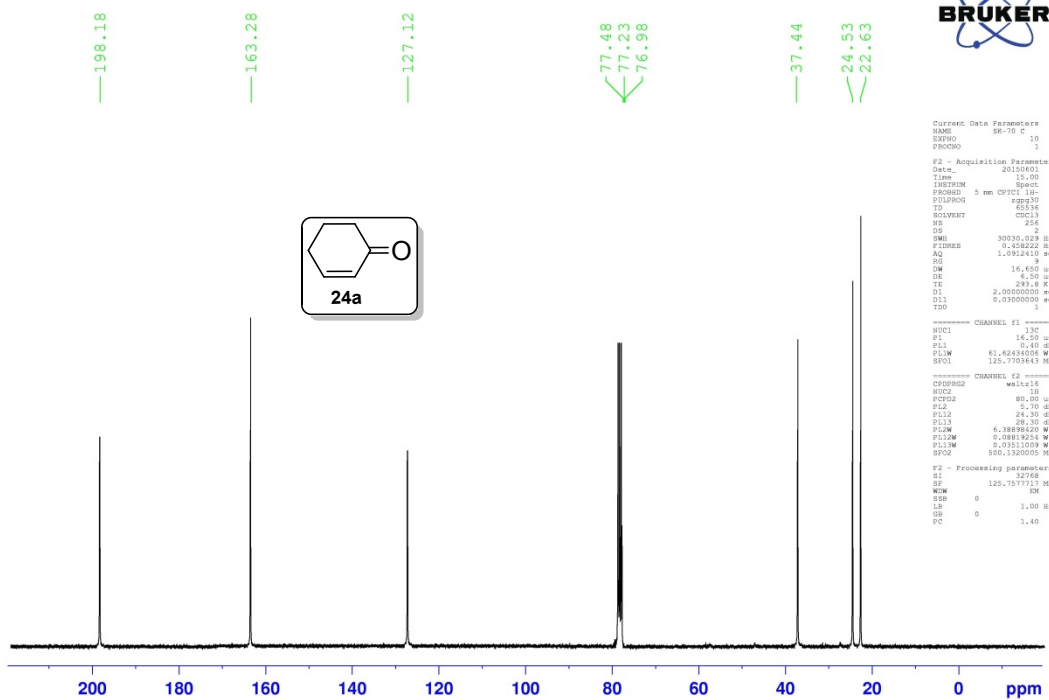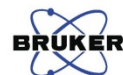

```

Current Data Parameters
NAME SKJ-68
EXPNO 10
PROCNO 1
F2 - Acquisition Parameters
Date_ 20150607
Time 12.06
INSTRUM spect
PROBHD 5 mm PABBO BB-
PULPROG zgpg30
TD 65536
SOLVENT CDCl3
NS 16
DS 2
SWE 10320.578 Hz
FIDRES 0.157632 Hz
AQ 3.1720407 sec
RG 203
DW 48.400 usec
DE 6.20 usec
TE 298.0 K
D1 1.0000000 sec
D11 0.0300000 sec
D12 0.0300000 sec
D13 0.0300000 sec
D14 0.0300000 sec
D15 0.0300000 sec
D16 0.0300000 sec
D17 0.0300000 sec
D18 0.0300000 sec
D19 0.0300000 sec
D20 0.0300000 sec
===== CHANNEL f1 =====
NUC1 13C
P1 14.90 usec
PL1 2.00 dB
PL12 14.9724056 W
PL13 14.9724056 W
SFO1 500.1330885 MHz
F2 - Processing parameters
SI 32768
SF 500.1330885 MHz
WDW EM
SSB 0
LB 0.30 Hz
GB 0
PC 1.00
  
```

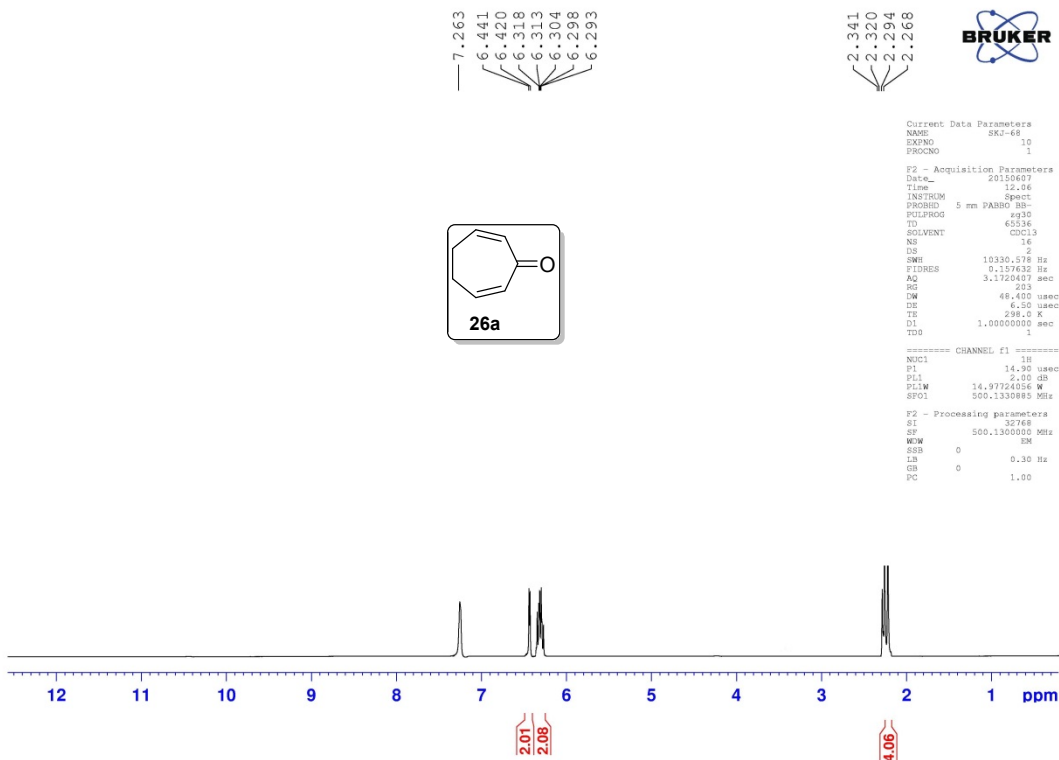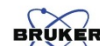

```

Current Data Parameters
NAME SKJ-68
EXPNO 10
PROCNO 1
F2 - Acquisition Parameters
Date_ 20150607
Time 12.06
INSTRUM spect
PROBHD 5 mm PABBO BB-
PULPROG zgpg30
TD 65536
SOLVENT CDCl3
NS 16
DS 2
SWE 10320.578 Hz
FIDRES 0.157632 Hz
AQ 3.1720407 sec
RG 203
DW 48.400 usec
DE 6.20 usec
TE 298.0 K
D1 1.0000000 sec
D11 0.0300000 sec
D12 0.0300000 sec
D13 0.0300000 sec
D14 0.0300000 sec
D15 0.0300000 sec
D16 0.0300000 sec
D17 0.0300000 sec
D18 0.0300000 sec
D19 0.0300000 sec
D20 0.0300000 sec
===== CHANNEL f1 =====
NUC1 1H
P1 14.90 usec
PL1 2.00 dB
PL12 14.9724056 W
PL13 14.9724056 W
SFO1 500.1330885 MHz
F2 - Processing parameters
SI 32768
SF 500.1330885 MHz
WDW EM
SSB 0
LB 0.30 Hz
GB 0
PC 1.00
  
```

sk-75

194.80

144.25

135.15

77.48  
77.23  
76.97

28.13

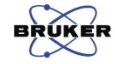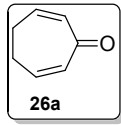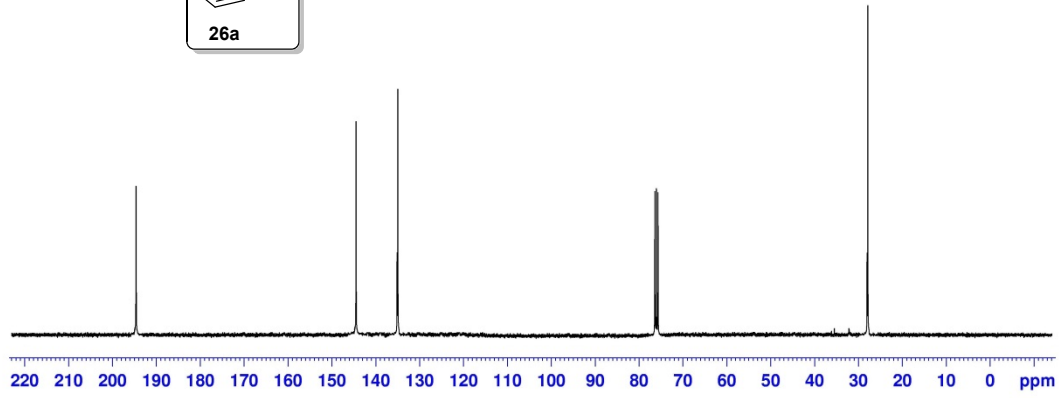

6  
8.008  
7.993  
7.648  
7.634  
7.620  
7.548  
7.532  
7.516  
7.501  
7.486  
7.260  
6.991  
6.976

5.489

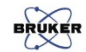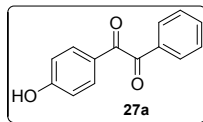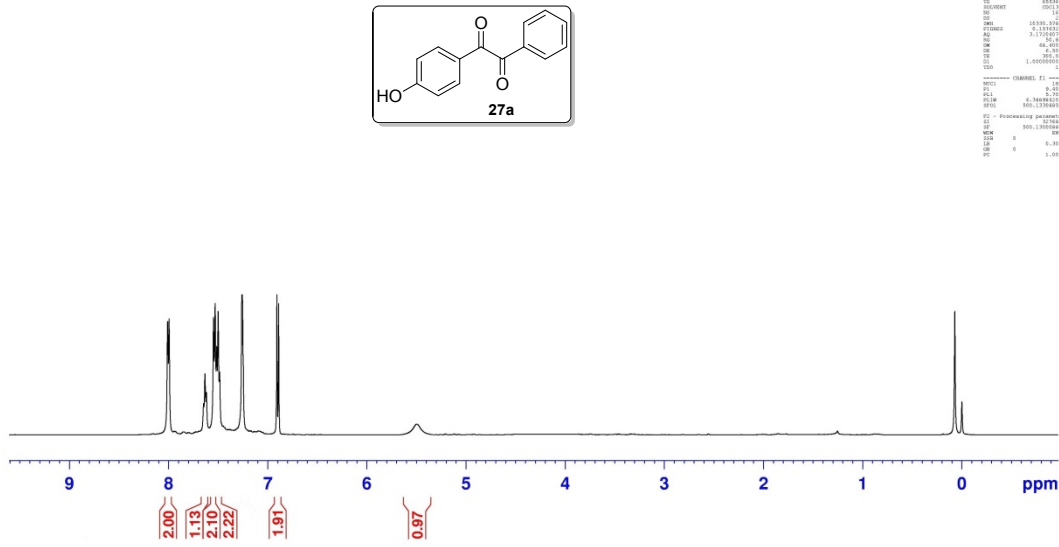

```
===== CHANNEL f1 =====
NUC1      13
P1          0.50 usec
PL1       0.000000 dB
PL12      0.000000 dB
SFO1      101.253000 MHz
F2 - Processing parameters
SI          32768
SF          500.137000 MHz
AQ          30
SFO         0.000000 MHz
AQ         0.000000 MHz
PC          1.00
```

SK-76 C

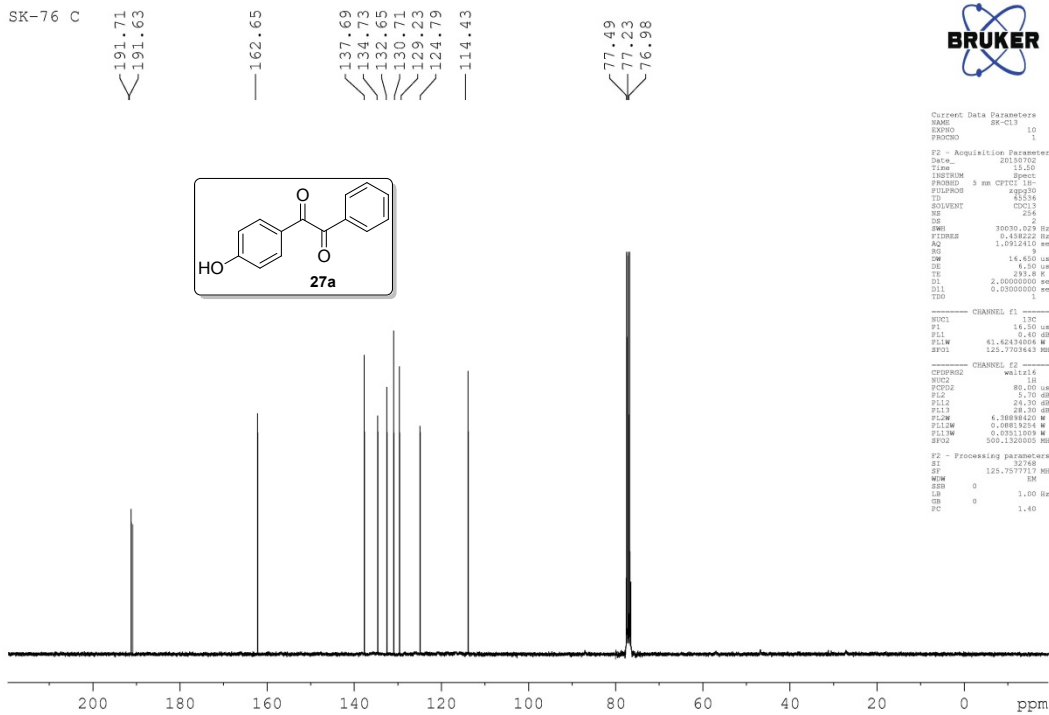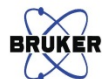

```

Current Data Parameters
NAME      SK-cl3
EXPNO    10
PROCNO   1
F2 - Acquisition Parameters
Date_    20100702
Time     12.50
INSTRUM  spect
PROBHD   5 mm CPY1 1H-
PULPROG  zgpg30
TD        65536
SOLVENT  CDCl3
DE        2.54
DS        2
SFO      300.135 MHz
FIDRES   0.189222 Hz
AQ        1.0722410 sec
RG         3
WDW        16.450 usec
DE         6.50 usec
TE        293.2 K
D1         2.0000000 sec
D11        0.0300000 sec
D10        1
----- CHANNEL f1 -----
NUC1      13C
P1         14.50 usec
PL1        0.40 dB
SFO1     125.7703443 MHz
----- CHANNEL f2 -----
CFPRPG   waltz16
NUC2      1H
PCPDZ    80.00 usec
PL2       5.70 dB
PL12      2.30 dB
PL13      2.30 dB
PL14      2.30 dB
PL15      2.30 dB
PL16      2.30 dB
PL17      2.30 dB
PL18      2.30 dB
PL19      2.30 dB
PL20      2.30 dB
PL21      2.30 dB
PL22      2.30 dB
PL23      2.30 dB
PL24      2.30 dB
PL25      2.30 dB
PL26      2.30 dB
PL27      2.30 dB
PL28      2.30 dB
PL29      2.30 dB
PL30      2.30 dB
PL31      2.30 dB
PL32      2.30 dB
PL33      2.30 dB
PL34      2.30 dB
PL35      2.30 dB
PL36      2.30 dB
PL37      2.30 dB
PL38      2.30 dB
PL39      2.30 dB
PL40      2.30 dB
PL41      2.30 dB
PL42      2.30 dB
PL43      2.30 dB
PL44      2.30 dB
PL45      2.30 dB
PL46      2.30 dB
PL47      2.30 dB
PL48      2.30 dB
PL49      2.30 dB
PL50      2.30 dB
PL51      2.30 dB
PL52      2.30 dB
PL53      2.30 dB
PL54      2.30 dB
PL55      2.30 dB
PL56      2.30 dB
PL57      2.30 dB
PL58      2.30 dB
PL59      2.30 dB
PL60      2.30 dB
PL61      2.30 dB
PL62      2.30 dB
PL63      2.30 dB
PL64      2.30 dB
PL65      2.30 dB
PL66      2.30 dB
PL67      2.30 dB
PL68      2.30 dB
PL69      2.30 dB
PL70      2.30 dB
PL71      2.30 dB
PL72      2.30 dB
PL73      2.30 dB
PL74      2.30 dB
PL75      2.30 dB
PL76      2.30 dB
PL77      2.30 dB
PL78      2.30 dB
PL79      2.30 dB
PL80      2.30 dB
PL81      2.30 dB
PL82      2.30 dB
PL83      2.30 dB
PL84      2.30 dB
PL85      2.30 dB
PL86      2.30 dB
PL87      2.30 dB
PL88      2.30 dB
PL89      2.30 dB
PL90      2.30 dB
PL91      2.30 dB
PL92      2.30 dB
PL93      2.30 dB
PL94      2.30 dB
PL95      2.30 dB
PL96      2.30 dB
PL97      2.30 dB
PL98      2.30 dB
PL99      2.30 dB
PL100     2.30 dB
----- Processing parameters -----
SI         32768
SF         125.767717 MHz
WDW        EM
SSB         0
LB          1.00 Hz
GB          0
PC          1.40
  
```

74-2

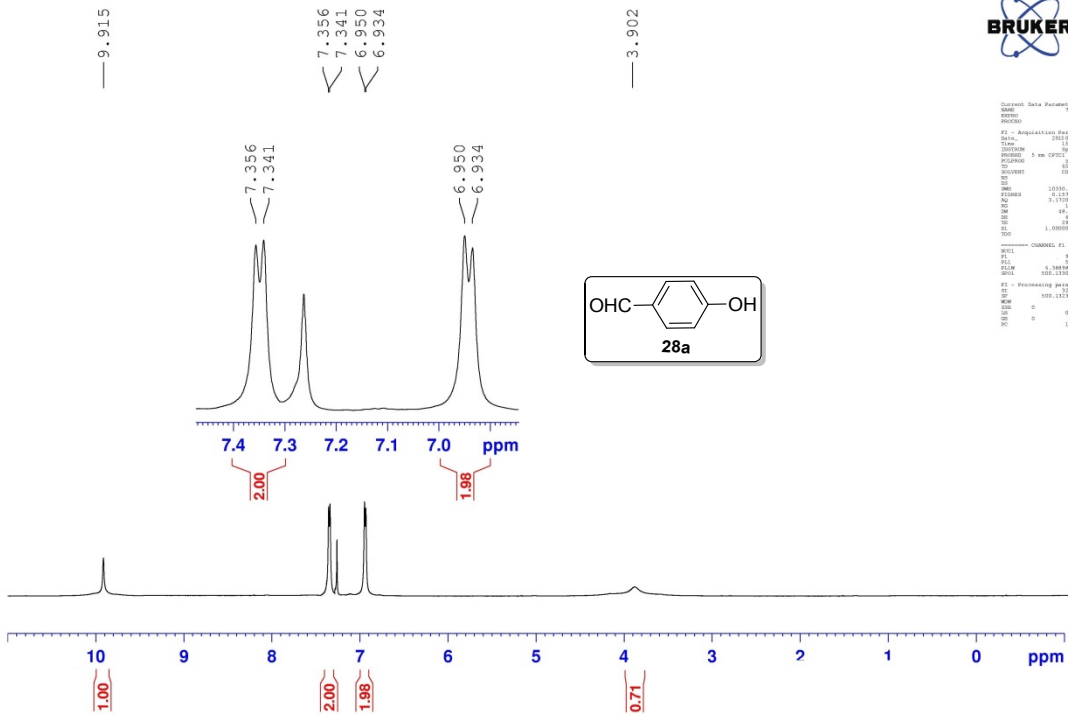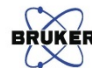

```

Current Data Parameters
NAME      74-2
EXPNO    1
PROCNO   1
F2 - Acquisition Parameters
Date_    20100702
Time     12.50
INSTRUM  spect
PROBHD   5 mm CPY1 1H-
PULPROG  zgpg30
TD        65536
SOLVENT  CDCl3
DE        2.54
DS        2
SFO      300.135 MHz
FIDRES   0.189222 Hz
AQ        1.0722410 sec
RG         3
WDW        16.450 usec
DE         6.50 usec
TE        293.2 K
D1         2.0000000 sec
D11        0.0300000 sec
D10        1
----- CHANNEL f1 -----
NUC1      1H
P1         14.50 usec
PL1        0.40 dB
SFO1     125.7703443 MHz
----- CHANNEL f2 -----
CFPRPG   waltz16
NUC2      13C
PCPDZ    80.00 usec
PL2       5.70 dB
PL12      2.30 dB
PL13      2.30 dB
PL14      2.30 dB
PL15      2.30 dB
PL16      2.30 dB
PL17      2.30 dB
PL18      2.30 dB
PL19      2.30 dB
PL20      2.30 dB
PL21      2.30 dB
PL22      2.30 dB
PL23      2.30 dB
PL24      2.30 dB
PL25      2.30 dB
PL26      2.30 dB
PL27      2.30 dB
PL28      2.30 dB
PL29      2.30 dB
PL30      2.30 dB
PL31      2.30 dB
PL32      2.30 dB
PL33      2.30 dB
PL34      2.30 dB
PL35      2.30 dB
PL36      2.30 dB
PL37      2.30 dB
PL38      2.30 dB
PL39      2.30 dB
PL40      2.30 dB
PL41      2.30 dB
PL42      2.30 dB
PL43      2.30 dB
PL44      2.30 dB
PL45      2.30 dB
PL46      2.30 dB
PL47      2.30 dB
PL48      2.30 dB
PL49      2.30 dB
PL50      2.30 dB
PL51      2.30 dB
PL52      2.30 dB
PL53      2.30 dB
PL54      2.30 dB
PL55      2.30 dB
PL56      2.30 dB
PL57      2.30 dB
PL58      2.30 dB
PL59      2.30 dB
PL60      2.30 dB
PL61      2.30 dB
PL62      2.30 dB
PL63      2.30 dB
PL64      2.30 dB
PL65      2.30 dB
PL66      2.30 dB
PL67      2.30 dB
PL68      2.30 dB
PL69      2.30 dB
PL70      2.30 dB
PL71      2.30 dB
PL72      2.30 dB
PL73      2.30 dB
PL74      2.30 dB
PL75      2.30 dB
PL76      2.30 dB
PL77      2.30 dB
PL78      2.30 dB
PL79      2.30 dB
PL80      2.30 dB
PL81      2.30 dB
PL82      2.30 dB
PL83      2.30 dB
PL84      2.30 dB
PL85      2.30 dB
PL86      2.30 dB
PL87      2.30 dB
PL88      2.30 dB
PL89      2.30 dB
PL90      2.30 dB
PL91      2.30 dB
PL92      2.30 dB
PL93      2.30 dB
PL94      2.30 dB
PL95      2.30 dB
PL96      2.30 dB
PL97      2.30 dB
PL98      2.30 dB
PL99      2.30 dB
PL100     2.30 dB
----- Processing parameters -----
SI         32768
SF         125.767717 MHz
WDW        EM
SSB         0
LB          1.00 Hz
GB          0
PC          1.40
  
```

sk-75 c

— 192.90  
 — 163.07  
 — 134.73  
 — 130.29  
 — 117.18  
 < 77.48  
 < 77.23  
 < 76.97

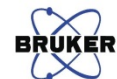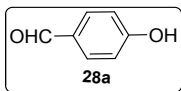

```

Current Data Parameters
NAME          C13
EXPNO        10
PROCNO       1

F2 - Acquisition Parameters
Date_        20100702
Time         19.10
INSTRUM      spect
PROBHD       5 mm CPYCI 13C
PULPROG      zgpg30
TD           65536
SOLVENT      CDCl3
NS           256
DS           4
SFO1         30013.029 Hz
FIDRES       0.449222 Hz
AQ           1.0092410 sec
RG           3
AQ           16.450 usec
DE           4.10 usec
TE           293.2 K
D1           2.00000000 sec
d11          0.00000000 sec
TD0          1

----- CHANNEL f1 -----
NUC1         13C
P1           16.00 usec
PL1         0.40 dB
PL12        63.6241406 Hz
SFO1        125.7703643 MHz

----- CHANNEL f2 -----
CPDPRG2     waltz16
NUC2         1H
PCPDZ       80.00 usec
PL2         2.70 dB
PL12        24.30 dB
PL13        28.30 dB
PL14        6.3889620 Hz
PL15        0.8819254 Hz
PL16        0.0201209 Hz
SFO2        500.1320085 MHz

F2 - Processing parameters
SI           32768
SF           125.7577117 MHz
RG           68K
SSB          0
WDW          EM
GB           0
MB           1.60
PC           1.40
  
```

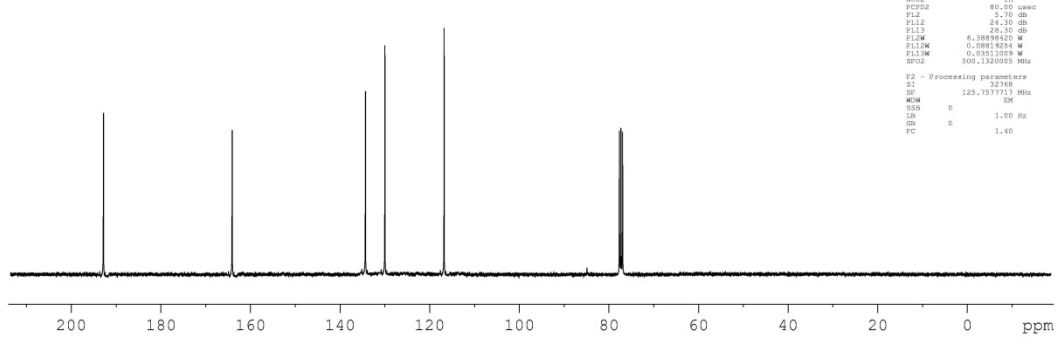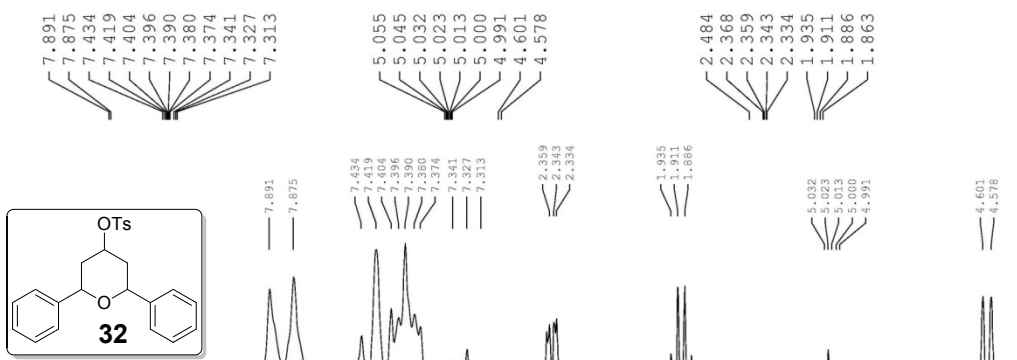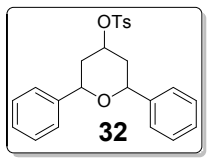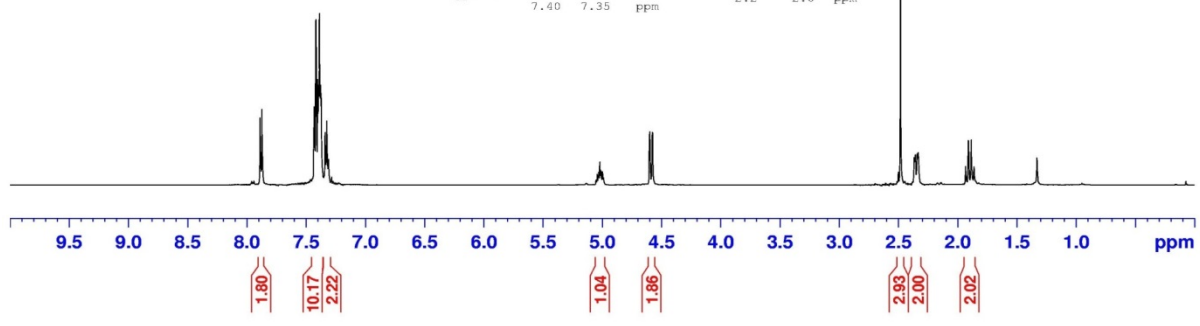

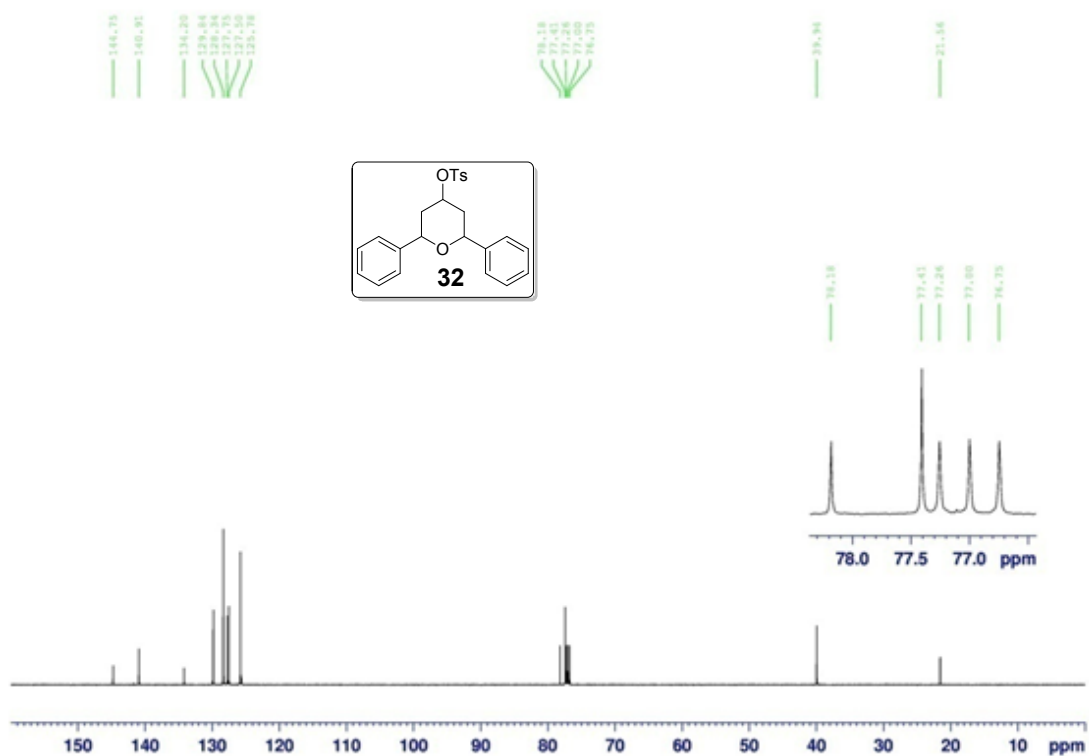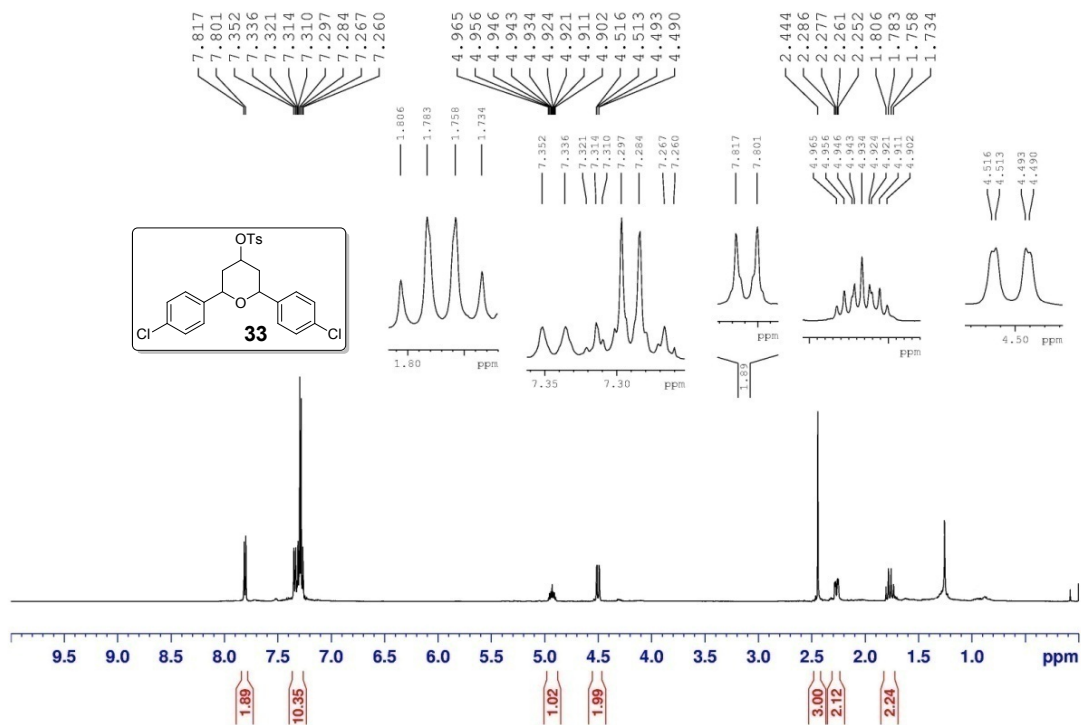

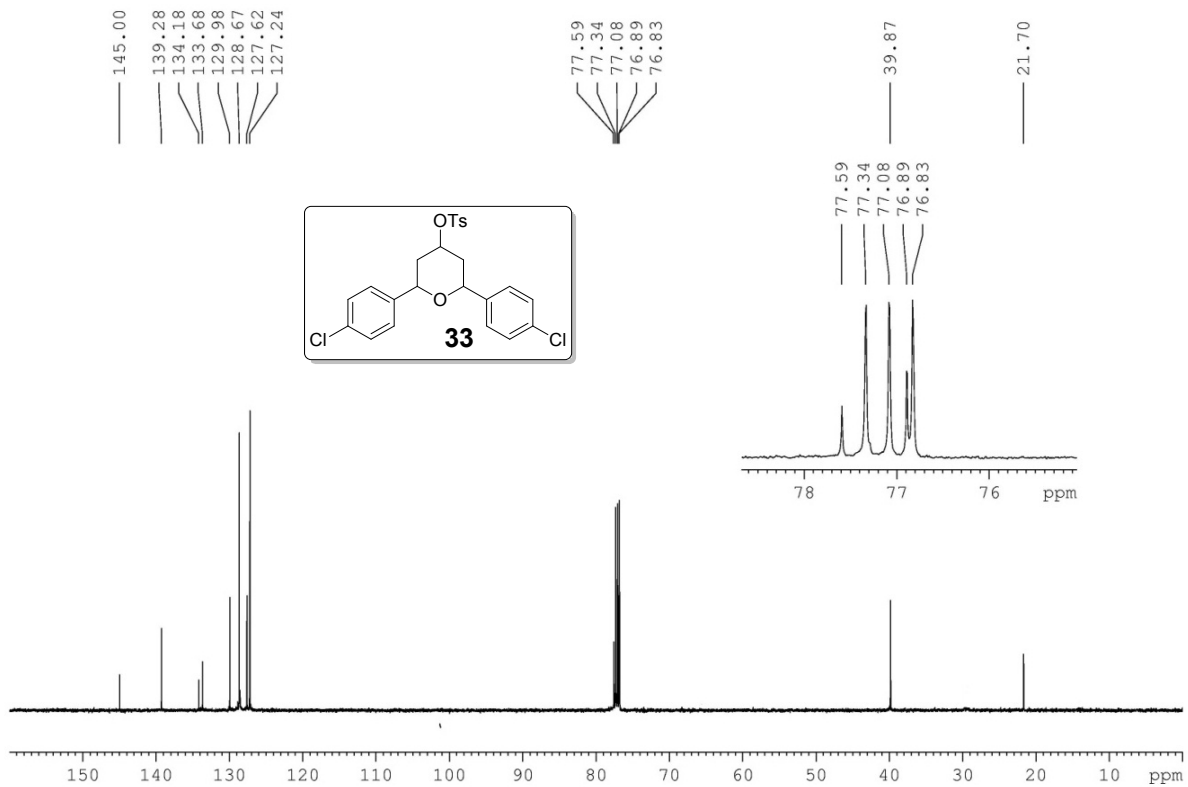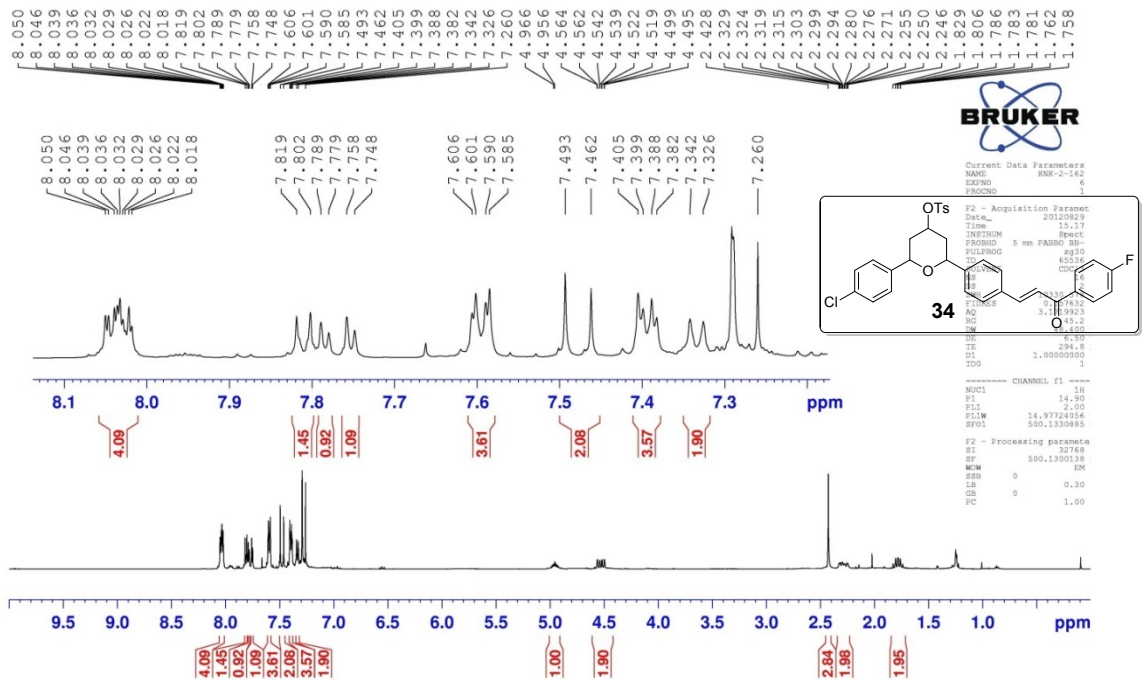

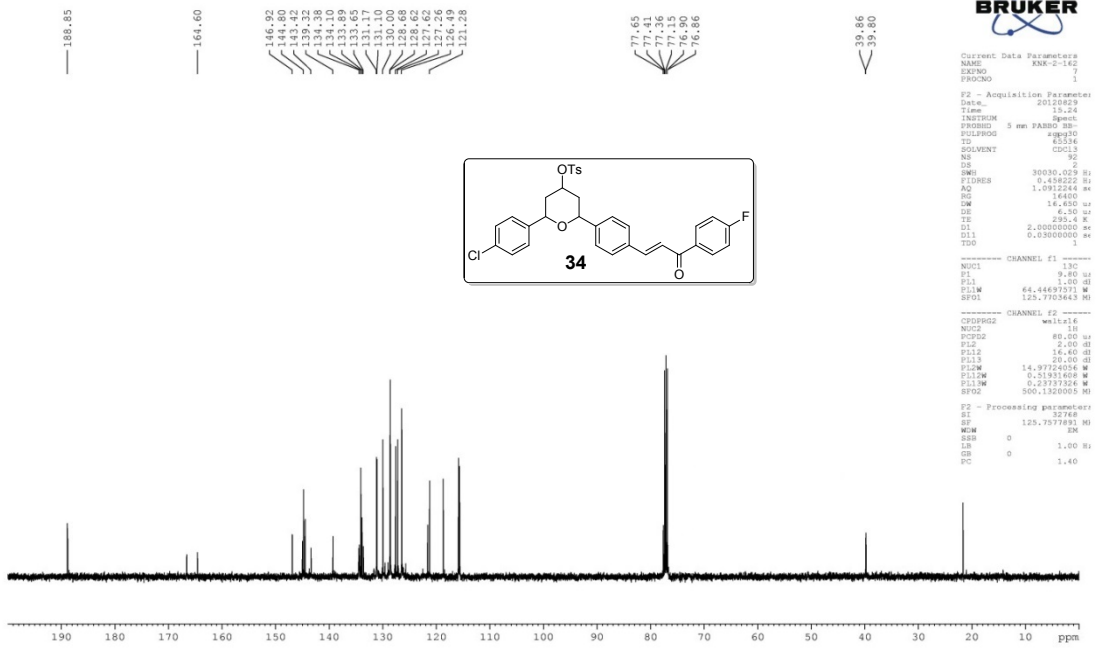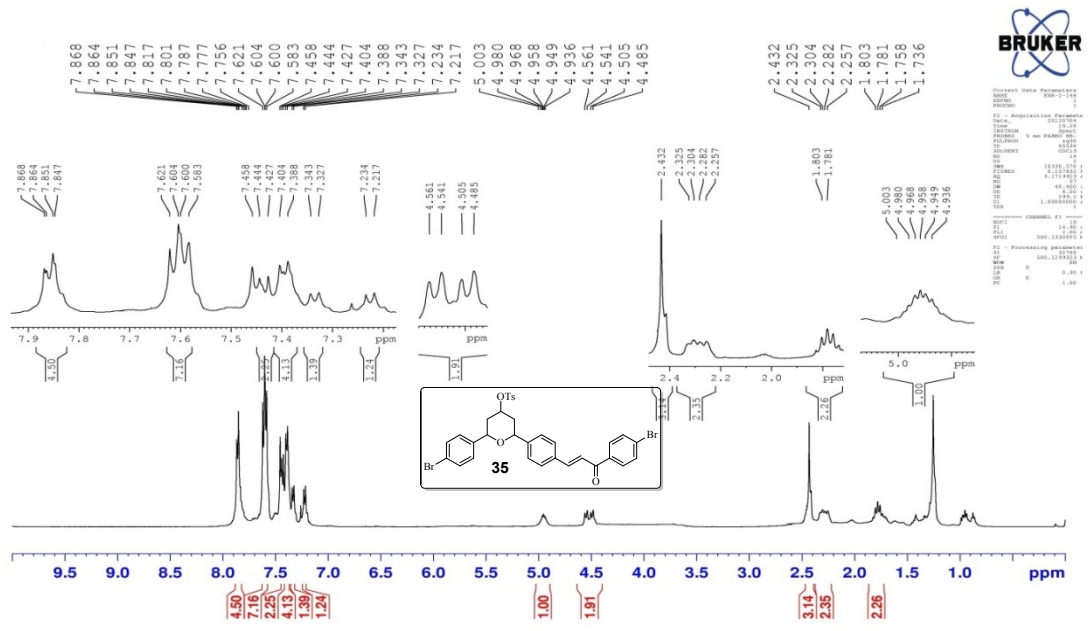

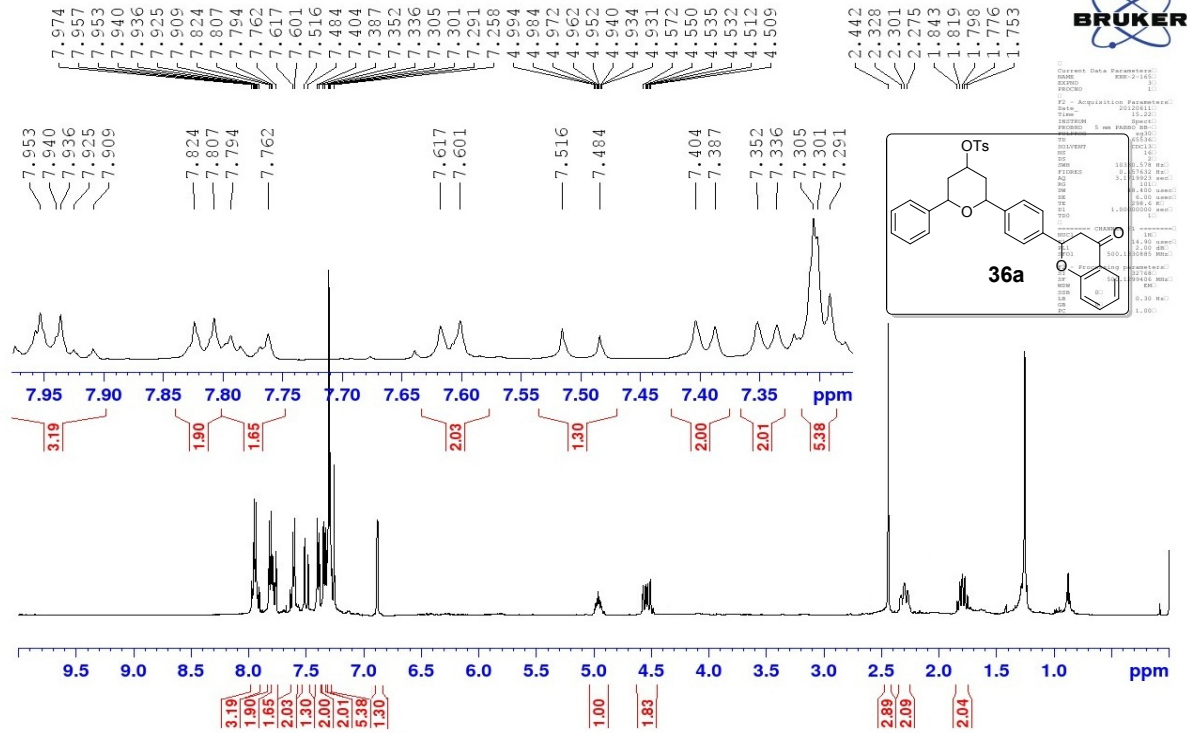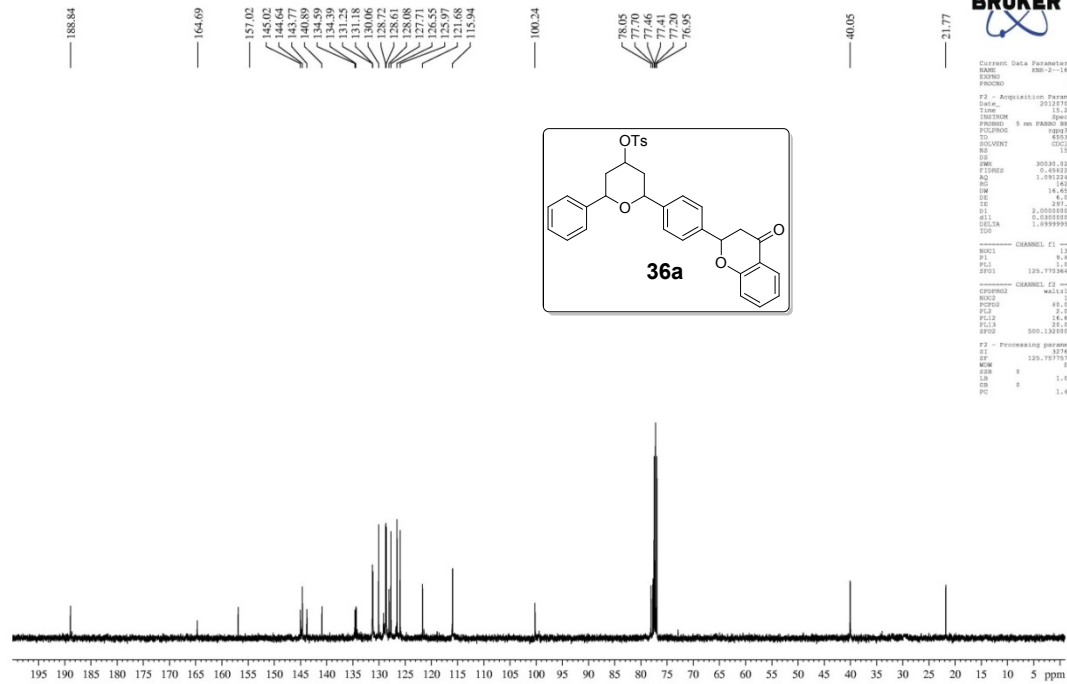



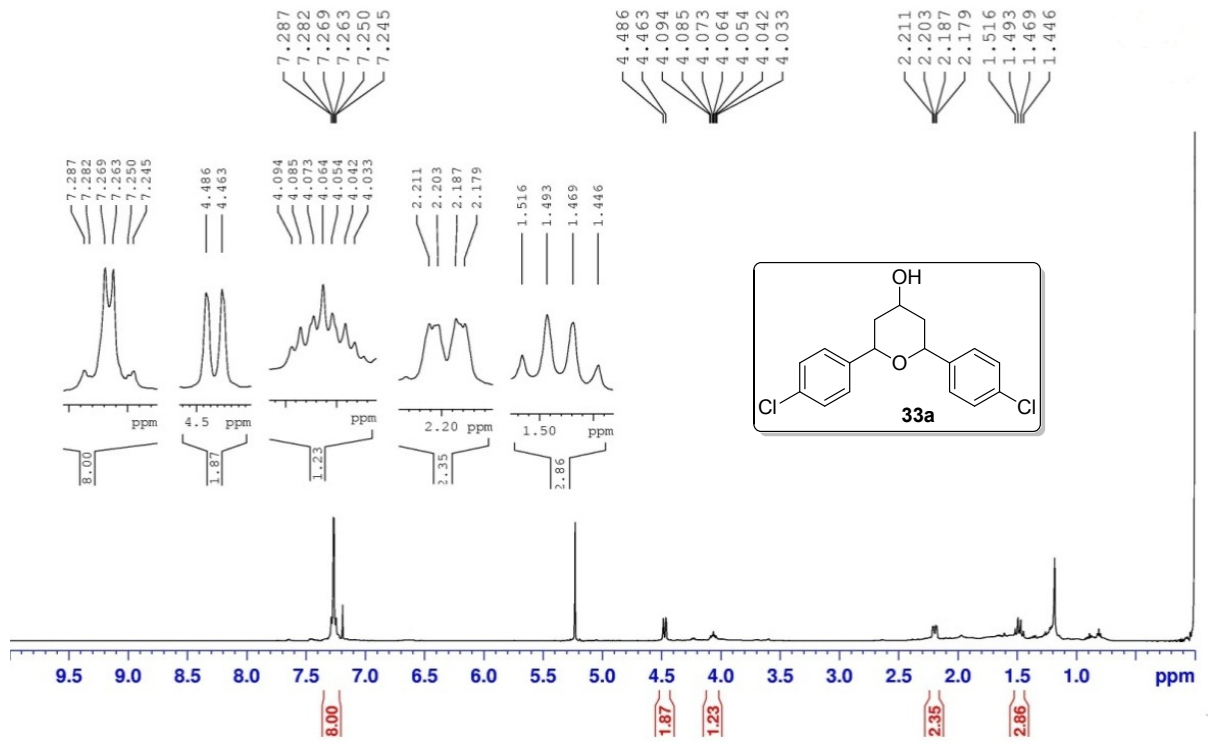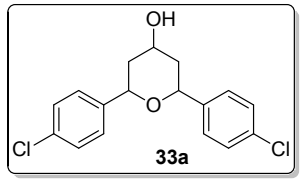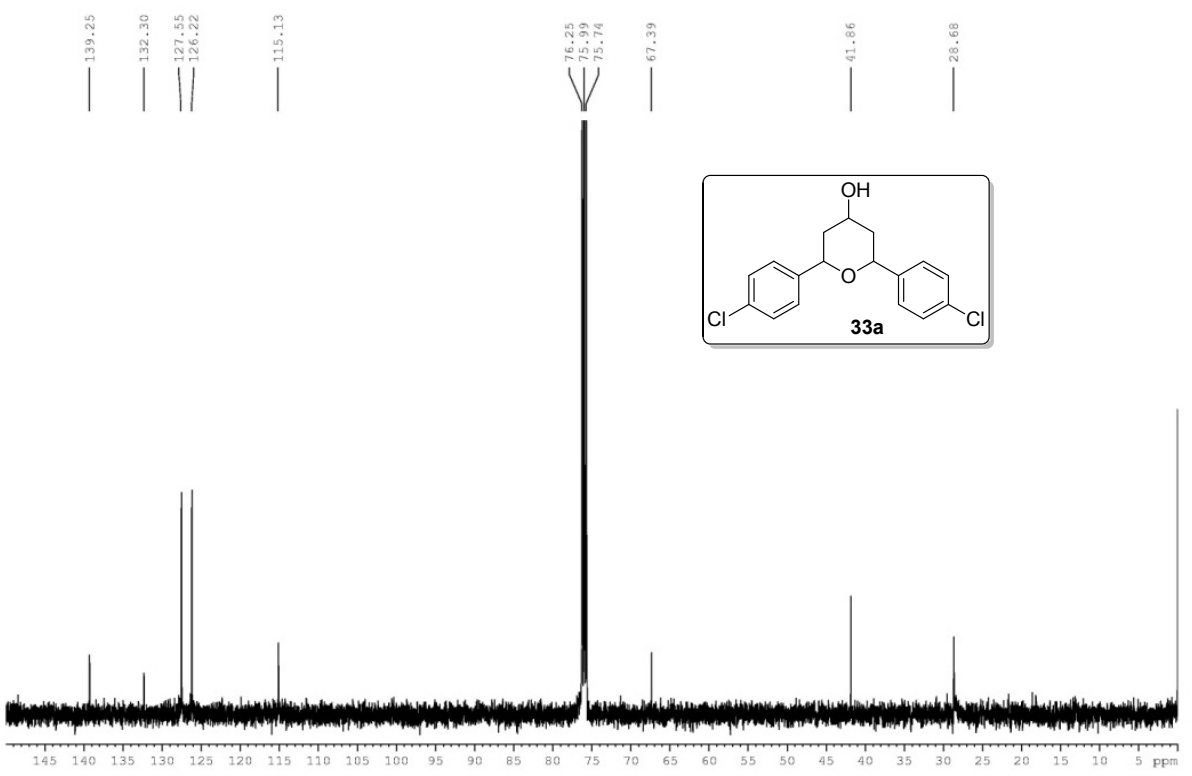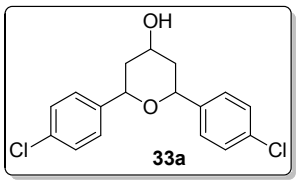

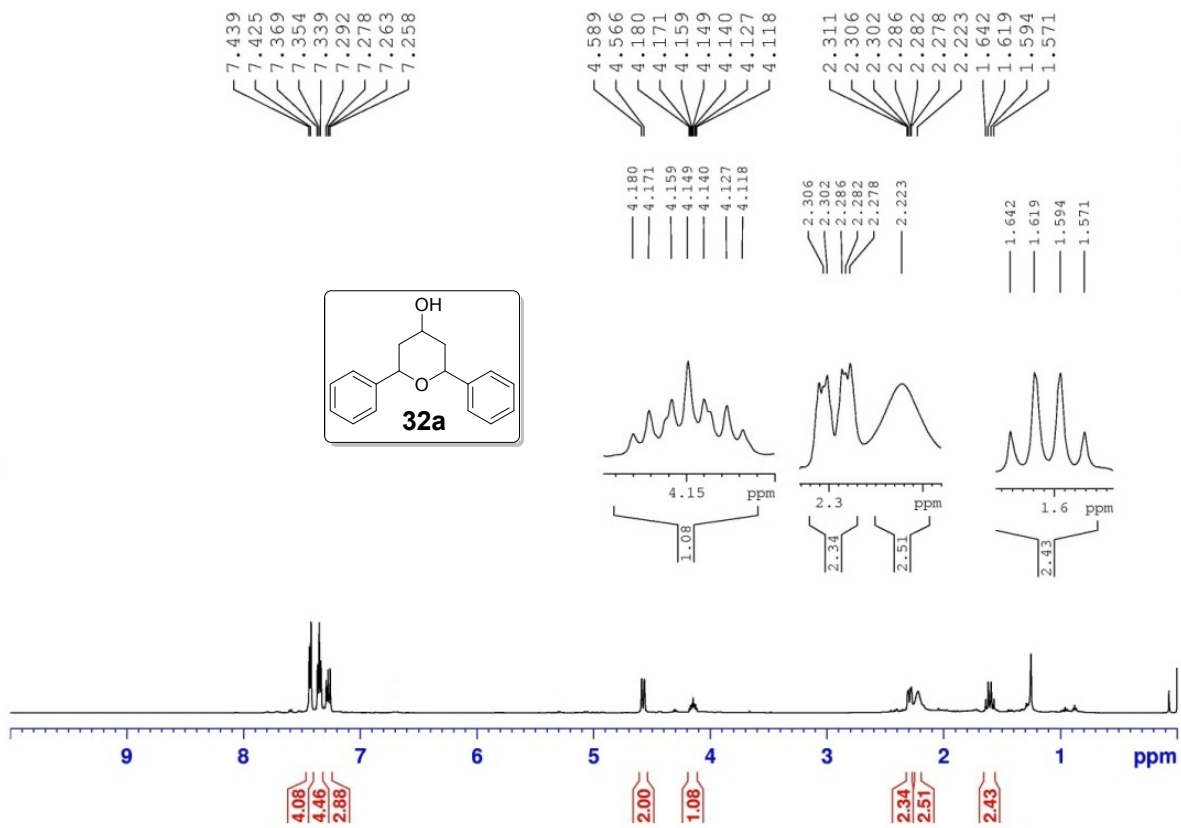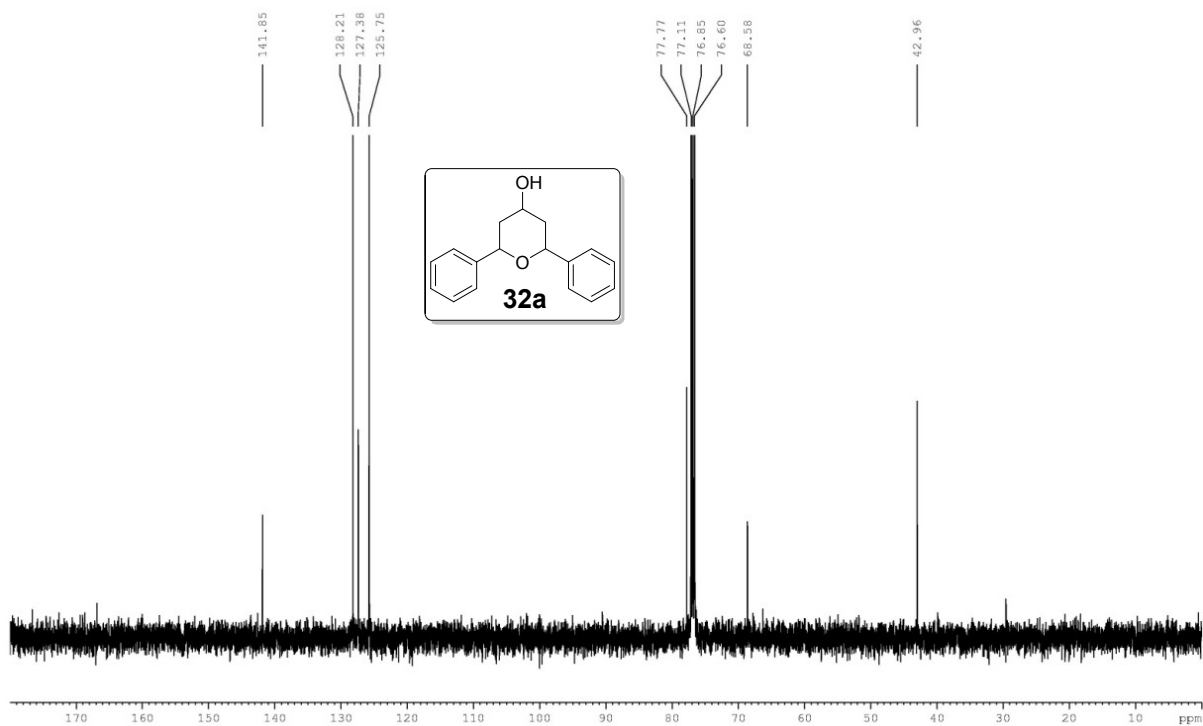

8  
PROTON CDC13

8.185  
8.179  
7.962  
7.946  
7.599  
7.582  
7.495  
7.479  
7.421  
7.404  
7.401  
7.376  
7.359  
7.021  
7.003

4.173  
4.164  
4.151  
4.173  
4.164  
4.151  
4.141  
4.132  
4.119  
4.110  
2.285  
2.281  
2.276  
2.255  
2.250  
2.229  
2.224  
2.220  
2.046  
1.869  
1.845  
1.821  
1.801  
1.798  
1.778  
1.754  
1.731

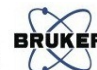

```
Current Data Parameters
NAME      RMR-2-172
EXPNO    2
PROCNO   1
F2 - Acquisition Parameters
Date_    20120704
Time     15.24
INSTRUM  spect
PROBHD   5 mm PABBO BBO-
PULPROG  zgpg30
TD       65536
SOLVENT  CDCl3
NS       153
DS       2
SWH      30030.029 H
FIDRES   0.458222 H
AQ       1.0912244 s
RG       1620
DM       16.650 u
DE       6.00 u
TE       297.3 K
D1       2.0000000 s
d11      0.0300000 s
DELTA    1.8999999 s
TDO      1
```

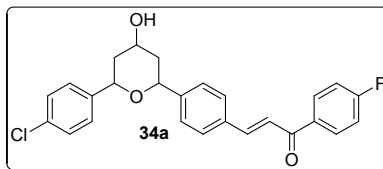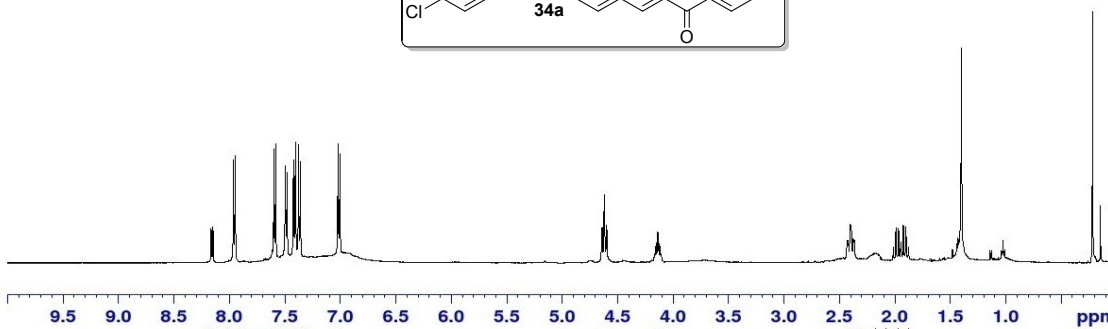

1.00  
2.00  
3.02  
2.17  
2.32  
2.06  
2.15  
2.00  
1.00  
2.15  
1.00  
2.32

188.84

166.72  
164.69  
144.64  
143.77  
140.89  
134.59  
134.39  
131.25  
130.06  
128.72  
127.71  
126.55  
125.97  
121.68  
115.94

78.05  
77.70  
77.46  
77.20  
76.95  
69.46

40.05

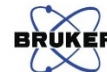

```
Current Data Parameters
NAME      RMR-2-172
EXPNO    2
PROCNO   1
F2 - Acquisition Parameters
Date_    20120704
Time     15.24
INSTRUM  spect
PROBHD   5 mm PABBO BBO-
PULPROG  zgpg30
TD       65536
SOLVENT  CDCl3
NS       153
DS       2
SWH      30030.029 H
FIDRES   0.458222 H
AQ       1.0912244 s
RG       1620
DM       16.650 u
DE       6.00 u
TE       297.3 K
D1       2.0000000 s
d11      0.0300000 s
DELTA    1.8999999 s
TDO      1
===== CHANNEL f1 =====
NUC1     13C
P1       9.00 u
PL1     125.7703640 H
===== CHANNEL f2 =====
CPDPRG2  waltz16
NUC2     1H
PCPD2    80.00 u
PL2     18.40 H
PL12    20.00 G
PL13    20.00 G
SFO2    500.1320000 H
F2 - Processing parameter
SI       32768
SF       125.7573513 H
WDM     FM
SBB     0
LB      1.00 H
GB      0
PC      1.40
```

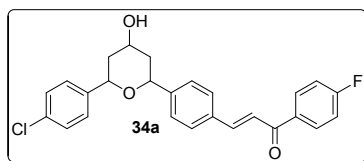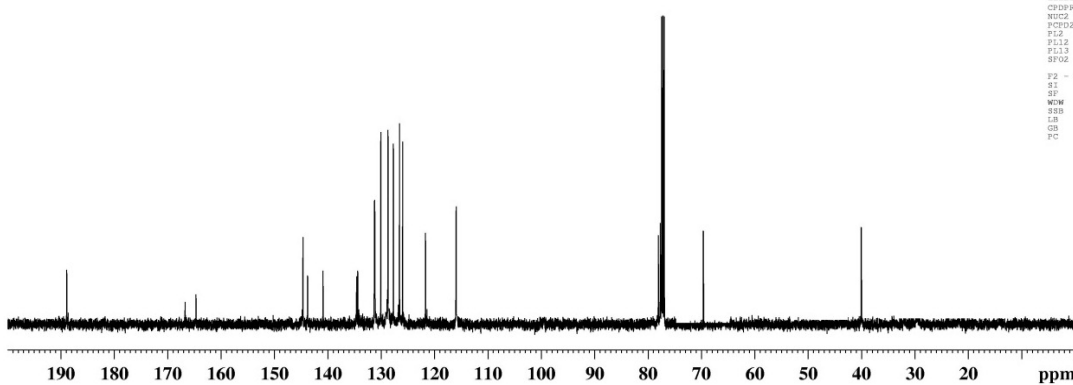



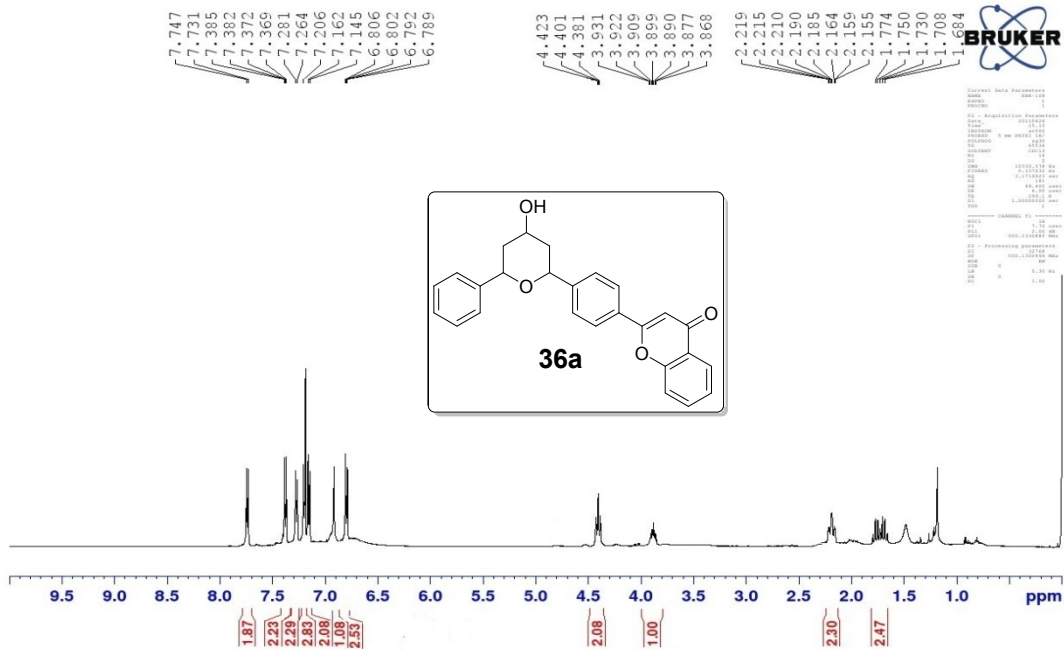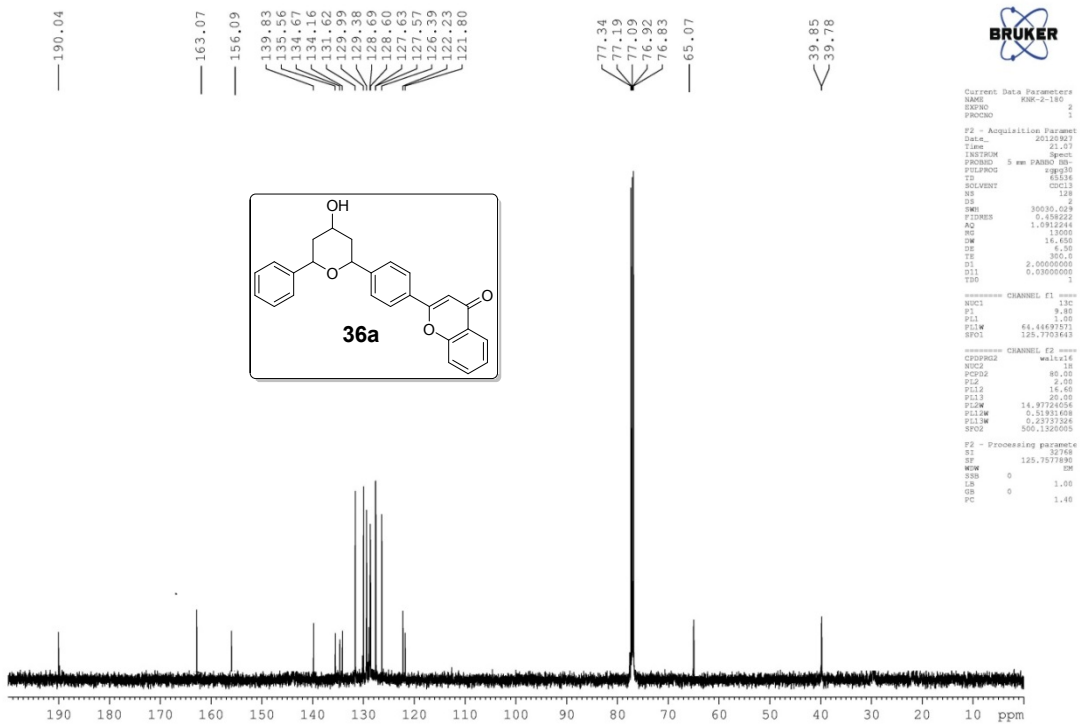

Supplement: c5gc01785h1.pdf [file c5gc01785h1.pdf]
